# Supplementary material for: A forward genetic screen reveals novel independent regulators of ULBP1, an activating ligand for natural killer cells
Source: eLife. 2015 Nov 13;4:e08474. doi: 10.7554/eLife.08474 (PMC4629278; doi:10.7554/eLife.08474)
Supplement: Supplementary file 1. — Complete list of hits and statistical analysis of all independent insertions mapped in the ULBP1 screen data set. (A) Annotated list of hits: The gene symbols of hits (p < 0.05) with a brief description of known or predicted gene functions. A p-value of enrichment was determined using Fisher's exact test, followed by correction for the false discovery rate. Yellow shading indicates genes confirmed in this study to impact ULBP1 expression. Light blue shading indicates genes involved in GPI biosynthesis and anchoring. Light orange shading genes involved in protein glycosylation. Gray shading indicates genes that have occurred in several unrelated screens using the same cells, perhaps indicating pleiotropic effects. Asterisks indicate two genes (SLC17A9 and CRNKL1) that, when targeted with CRISPR/Cas9, failed to result in decreased ULBP1 expression. (B) Statistical analysis: Statistical analysis of all independent insertions mapped in the ULBP1 screen data set. DOI: http://dx.doi.org/10.7554/eLife.08474.025 [file elife08474s001.xlsx]

## Sheet: expExonSenseIntronVScontrol.sta
GENE SYMBOL	# of insertions in selected library	total insertions in selected library	# of insertions in control library	total insertions in control library	P-value (uncorrected)	P-value (corrected for multiple hypothesis testing)	Fold-enrichment of insertions in selected library
PIGW	157	6665	41	226643	3.38138e-200	1.12262e-196	130.214
PIGQ	110	6665	8	226643	1.96261e-158	3.25793e-155	467.568
PIGB	76	6665	9	226643	2.14882e-106	2.37803e-103	287.153
ULBP1	52	6665	1	226643	3.19221e-79	2.64953e-76	1768.26
PIGO	48	6665	5	226643	2.248e-68	1.49267e-65	326.448
PIGU	54	6665	20	226643	1.70519e-66	9.4354e-64	91.8134
PGAP2	48	6665	23	226643	1.24103e-56	5.88604e-54	70.9669
MPDU1	54	6665	46	226643	1.00945e-55	4.18922e-53	39.9189
PIGP	47	6665	28	226643	4.44202e-53	1.63861e-50	57.0797
PIGL	47	6665	35	226643	2.05631e-50	6.82695e-48	45.6638
PIGH	28	6665	5	226643	1.27177e-38	3.83843e-36	190.428
PIGC	25	6665	6	226643	1.62743e-33	4.50257e-31	141.687
PIGX	21	6665	4	226643	4.38326e-29	1.11942e-26	178.526
RBM4	22	6665	10	226643	5.42112e-27	1.28558e-24	74.8109
PIGV	28	6665	40	226643	2.00039e-25	4.42753e-23	23.8035
PIGK	19	6665	17	226643	2.53696e-20	5.26419e-18	38.0055
DPM3	13	6665	1	226643	1.16547e-19	2.27609e-17	442.064
PIGN	17	6665	15	226643	2.15548e-18	3.97567e-16	38.5389
SPCS1	15	6665	9	226643	7.17431e-18	1.25362e-15	56.6749
PIGM	10	6665	0	226643	3.64909e-16	6.05749e-14	INF
C1GALT1C1	13	6665	8	226643	1.40302e-15	2.2181e-13	55.258
PIGT	12	6665	7	226643	1.24839e-14	1.77274e-12	58.2942
PIGF	11	6665	4	226643	1.2815e-14	1.77274e-12	93.5136
SLC35A1	11	6665	4	226643	1.2815e-14	1.77274e-12	93.5136
PIGA	10	6665	2	226643	2.28475e-14	3.03415e-12	170.025
PIGS	12	6665	8	226643	3.03862e-14	3.88008e-12	51.0074
GPAA1	10	6665	3	226643	9.64316e-14	1.18575e-11	113.35
ST3GAL2	17	6665	38	226643	1.38604e-13	1.64345e-11	15.2127
SPCS2	11	6665	15	226643	5.4173e-11	6.20188e-09	24.937
HSPA13	5	6665	1	226643	1.11681e-07	1.23594e-05	170.025
FLJ37453	11	6665	65	226643	1.07478e-05	0.00115105	5.75468
PBRM1	21	6665	245	226643	3.35803e-05	0.00348395	2.91471
MALAT1	12	6665	92	226643	4.49053e-05	0.00451775	4.43543
SLC17A9	4	6665	5	226643	7.48766e-05	0.00715245	27.204
RPS25	7	6665	30	226643	7.54023e-05	0.00715245	7.93449
ATF4	3	6665	2	226643	0.000223451	0.0206071	51.0074
PMM2	6	6665	26	226643	0.00026031	0.0233575	7.8473
NCRNA00167	5	6665	18	226643	0.000416795	0.0363	9.44582
CRNKL1	3	6665	3	226643	0.000437349	0.0363	34.005
ICK	3	6665	3	226643	0.000437349	0.0363	34.005
TBC1D19	5	6665	19	226643	0.000514099	0.0416295	8.94867
ZNF236	5	6665	20	226643	0.000627525	0.0496043	8.50124
ANPEP	2	6665	0	226643	0.000816452	0.0616051
NANOS1	2	6665	0	226643	0.000816452	0.0616051
DNAJC13	4	6665	13	226643	0.00117722	0.086853
GANAB	4	6665	14	226643	0.00147941	0.106775
SP3	4	6665	15	226643	0.00183167	0.129386
GLTPD2	2	6665	1	226643	0.00240269	0.156731
ZNF814	2	6665	1	226643	0.00240269	0.156731
ZNF816A	2	6665	1	226643	0.00240269	0.156731
UBXN2A	3	6665	7	226643	0.00240761	0.156731
VPS41	7	6665	58	226643	0.00254346	0.16239
ATXN2L	3	6665	8	226643	0.00324023	0.199214
SPCS3	3	6665	8	226643	0.00324023	0.199214
CNBP	4	6665	19	226643	0.0038207	0.230631
PUS7L	3	6665	9	226643	0.00422879	0.250707
FGF12	2	6665	2	226643	0.00471404	0.265265
FIGNL2	2	6665	2	226643	0.00471404	0.265265
RDM1	2	6665	2	226643	0.00471404	0.265265
DNAJC27	6	6665	50	226643	0.00520852	0.274853
C1orf56	3	6665	10	226643	0.00538115	0.274853
GNAZ	3	6665	10	226643	0.00538115	0.274853
HM13	3	6665	10	226643	0.00538115	0.274853
SAFB2	3	6665	10	226643	0.00538115	0.274853
ZCCHC3	3	6665	10	226643	0.00538115	0.274853
NRG2	3	6665	11	226643	0.00670411	0.327318
SIGMAR1	3	6665	11	226643	0.00670411	0.327318
STOML2	3	6665	11	226643	0.00670411	0.327318
ST3GAL4	2	6665	3	226643	0.00770777	0.363139
TAP1	2	6665	3	226643	0.00770777	0.363139
CSNK2A1	3	6665	12	226643	0.00820345	0.363139
LFNG	3	6665	12	226643	0.00820345	0.363139
SMO	3	6665	12	226643	0.00820345	0.363139
TBX1	3	6665	12	226643	0.00820345	0.363139
TMUB1	3	6665	12	226643	0.00820345	0.363139
C11orf41	5	6665	41	226643	0.00987068	0.404932
BCKDHB	3	6665	13	226643	0.009884	0.404932
C3orf18	3	6665	13	226643	0.009884	0.404932
C5orf24	3	6665	13	226643	0.009884	0.404932
CHD3	6	6665	58	226643	0.00992485	0.404932
MAGIX	4	6665	26	226643	0.010094	0.404932
ARAF	2	6665	4	226643	0.011343	0.404932
DCAF16	2	6665	4	226643	0.011343	0.404932
GGA2	2	6665	4	226643	0.011343	0.404932
GNPNAT1	2	6665	4	226643	0.011343	0.404932
LOC255512	2	6665	4	226643	0.011343	0.404932
LUZP1	2	6665	4	226643	0.011343	0.404932
NRAS	2	6665	4	226643	0.011343	0.404932
RAB27A	2	6665	4	226643	0.011343	0.404932
RPS6KA4	2	6665	4	226643	0.011343	0.404932
UFSP1	2	6665	4	226643	0.011343	0.404932
VPS35	2	6665	4	226643	0.011343	0.404932
ZNF800	2	6665	4	226643	0.011343	0.404932
MICAL3	3	6665	14	226643	0.0117497	0.410623
TAB1	3	6665	14	226643	0.0117497	0.410623
MYL12A	3	6665	15	226643	0.0138038	0.456046
C1orf66	2	6665	5	226643	0.0155806	0.456046
CCDC149	2	6665	5	226643	0.0155806	0.456046
CDC37L1	2	6665	5	226643	0.0155806	0.456046
DVL3	2	6665	5	226643	0.0155806	0.456046
FOXF2	2	6665	5	226643	0.0155806	0.456046
LOC202781	2	6665	5	226643	0.0155806	0.456046
LPIN1	2	6665	5	226643	0.0155806	0.456046
NOTCH1	2	6665	5	226643	0.0155806	0.456046
TRIM14	2	6665	5	226643	0.0155806	0.456046
UHRF2	2	6665	5	226643	0.0155806	0.456046
MKNK2	3	6665	16	226643	0.0160486	0.456046
RFX5	3	6665	16	226643	0.0160486	0.456046
SLC25A25	3	6665	17	226643	0.0184857	0.456046
TFR2	3	6665	17	226643	0.0184857	0.456046
ACCN1	2	6665	6	226643	0.0203831	0.456046
C17orf58	2	6665	6	226643	0.0203831	0.456046
C21orf63	2	6665	6	226643	0.0203831	0.456046
CLCN6	2	6665	6	226643	0.0203831	0.456046
DGKI	2	6665	6	226643	0.0203831	0.456046
H3F3A	2	6665	6	226643	0.0203831	0.456046
LOC100132707	2	6665	6	226643	0.0203831	0.456046
LOC440926	2	6665	6	226643	0.0203831	0.456046
LOC644538	2	6665	6	226643	0.0203831	0.456046
NPHP4	2	6665	6	226643	0.0203831	0.456046
PIN4	2	6665	6	226643	0.0203831	0.456046
RBBP7	2	6665	6	226643	0.0203831	0.456046
RNF187	2	6665	6	226643	0.0203831	0.456046
SCN1A	2	6665	6	226643	0.0203831	0.456046
SFRS4	2	6665	6	226643	0.0203831	0.456046
SIX5	2	6665	6	226643	0.0203831	0.456046
ZNF593	2	6665	6	226643	0.0203831	0.456046
DENND1A	4	6665	33	226643	0.0207921	0.456046
ADPRHL1	3	6665	18	226643	0.0211163	0.456046
GAA	3	6665	18	226643	0.0211163	0.456046
DMD	9	6665	134	226643	0.0222552	0.456046
FBXL17	4	6665	34	226643	0.0227254	0.456046
STAT6	4	6665	34	226643	0.0227254	0.456046
VGLL4	4	6665	34	226643	0.0227254	0.456046
HAGHL	3	6665	19	226643	0.0239407	0.456046
LOC338799	10	6665	159	226643	0.0242016	0.456046
FAM190A	8	6665	115	226643	0.0253786	0.456046
ANKRD16	2	6665	7	226643	0.0257149	0.456046
ARMCX5	2	6665	7	226643	0.0257149	0.456046
CAND1	2	6665	7	226643	0.0257149	0.456046
CUL7	2	6665	7	226643	0.0257149	0.456046
GEMIN7	2	6665	7	226643	0.0257149	0.456046
KLF10	2	6665	7	226643	0.0257149	0.456046
MIF	2	6665	7	226643	0.0257149	0.456046
SOX12	2	6665	7	226643	0.0257149	0.456046
SPRED2	2	6665	7	226643	0.0257149	0.456046
STK31	2	6665	7	226643	0.0257149	0.456046
TNPO1	2	6665	7	226643	0.0257149	0.456046
AGPS	14	6665	259	226643	0.0267644	0.456046
ACAN	1	6665	0	226643	0.0285716	0.456046
AGPAT2	1	6665	0	226643	0.0285716	0.456046
AMHR2	1	6665	0	226643	0.0285716	0.456046
ARHGAP22	1	6665	0	226643	0.0285716	0.456046
ASGR1	1	6665	0	226643	0.0285716	0.456046
C10orf10	1	6665	0	226643	0.0285716	0.456046
C10orf62	1	6665	0	226643	0.0285716	0.456046
C12orf63	1	6665	0	226643	0.0285716	0.456046
C13orf29	1	6665	0	226643	0.0285716	0.456046
C1orf116	1	6665	0	226643	0.0285716	0.456046
C1orf52	1	6665	0	226643	0.0285716	0.456046
C3	1	6665	0	226643	0.0285716	0.456046
C9orf64	1	6665	0	226643	0.0285716	0.456046
CCT6P3	1	6665	0	226643	0.0285716	0.456046
CLEC1A	1	6665	0	226643	0.0285716	0.456046
CLECL1	1	6665	0	226643	0.0285716	0.456046
CPA5	1	6665	0	226643	0.0285716	0.456046
DUSP8	1	6665	0	226643	0.0285716	0.456046
ENPP4	1	6665	0	226643	0.0285716	0.456046
FOXO4	1	6665	0	226643	0.0285716	0.456046
FRK	1	6665	0	226643	0.0285716	0.456046
GAST	1	6665	0	226643	0.0285716	0.456046
GPRASP2	1	6665	0	226643	0.0285716	0.456046
GRIK3	1	6665	0	226643	0.0285716	0.456046
HES6	1	6665	0	226643	0.0285716	0.456046
HSF2	1	6665	0	226643	0.0285716	0.456046
HSH2D	1	6665	0	226643	0.0285716	0.456046
KBTBD8	1	6665	0	226643	0.0285716	0.456046
KIAA1644	1	6665	0	226643	0.0285716	0.456046
KSR2	1	6665	0	226643	0.0285716	0.456046
LOC100130238	1	6665	0	226643	0.0285716	0.456046
LOC168474	1	6665	0	226643	0.0285716	0.456046
MAFA	1	6665	0	226643	0.0285716	0.456046
MARCH11	1	6665	0	226643	0.0285716	0.456046
MCOLN1	1	6665	0	226643	0.0285716	0.456046
MDFI	1	6665	0	226643	0.0285716	0.456046
MICAL1	1	6665	0	226643	0.0285716	0.456046
MOAP1	1	6665	0	226643	0.0285716	0.456046
MSTN	1	6665	0	226643	0.0285716	0.456046
NKX2-1	1	6665	0	226643	0.0285716	0.456046
PAQR9	1	6665	0	226643	0.0285716	0.456046
PLEKHG2	1	6665	0	226643	0.0285716	0.456046
PRNT	1	6665	0	226643	0.0285716	0.456046
PTAFR	1	6665	0	226643	0.0285716	0.456046
RANBP2	1	6665	0	226643	0.0285716	0.456046
RFNG	1	6665	0	226643	0.0285716	0.456046
RGS7BP	1	6665	0	226643	0.0285716	0.456046
RIBC2	1	6665	0	226643	0.0285716	0.456046
SLC6A17	1	6665	0	226643	0.0285716	0.456046
SPP2	1	6665	0	226643	0.0285716	0.456046
TFG	1	6665	0	226643	0.0285716	0.456046
TMEM106A	1	6665	0	226643	0.0285716	0.456046
TNFAIP3	1	6665	0	226643	0.0285716	0.456046
TPPP3	1	6665	0	226643	0.0285716	0.456046
UBLCP1	1	6665	0	226643	0.0285716	0.456046
VGLL1	1	6665	0	226643	0.0285716	0.456046
ZNF790	1	6665	0	226643	0.0285716	0.456046
ZNF823	1	6665	0	226643	0.0285716	0.456046
ZSCAN18	1	6665	0	226643	0.0285716	0.456046
MLL2	3	6665	21	226643	0.0301696	0.461315
GNL3L	5	6665	56	226643	0.0302509	0.461315
TICAM1	4	6665	38	226643	0.0315251	0.461315
ABCA2	2	6665	8	226643	0.0315417	0.461315
CEBPB	2	6665	8	226643	0.0315417	0.461315
CNTNAP1	2	6665	8	226643	0.0315417	0.461315
DPM1	2	6665	8	226643	0.0315417	0.461315
ESYT1	2	6665	8	226643	0.0315417	0.461315
GPT2	2	6665	8	226643	0.0315417	0.461315
MAP7D3	2	6665	8	226643	0.0315417	0.461315
MFSD3	2	6665	8	226643	0.0315417	0.461315
SLFN11	2	6665	8	226643	0.0315417	0.461315
TBC1D8	2	6665	8	226643	0.0315417	0.461315
TMEM121	2	6665	8	226643	0.0315417	0.461315
TMEM64	2	6665	8	226643	0.0315417	0.461315
TSPO	2	6665	8	226643	0.0315417	0.461315
TUBB6	2	6665	8	226643	0.0315417	0.461315
USP47	2	6665	8	226643	0.0315417	0.461315
ZHX1	2	6665	8	226643	0.0315417	0.461315
LZTS2	3	6665	22	226643	0.0335723	0.484609
PPIB	3	6665	22	226643	0.0335723	0.484609
PVT1	3	6665	22	226643	0.0335723	0.484609
MAZ	4	6665	39	226643	0.0339959	0.488599
C14orf176	3	6665	23	226643	0.0371652	0.504982
ADRBK1	2	6665	9	226643	0.0378309	0.504982
C1orf105	2	6665	9	226643	0.0378309	0.504982
CCDC66	2	6665	9	226643	0.0378309	0.504982
CCPG1	2	6665	9	226643	0.0378309	0.504982
CYB5D1	2	6665	9	226643	0.0378309	0.504982
FAM155A	2	6665	9	226643	0.0378309	0.504982
INCA1	2	6665	9	226643	0.0378309	0.504982
PAPD5	2	6665	9	226643	0.0378309	0.504982
PTK2B	2	6665	9	226643	0.0378309	0.504982
TESK2	2	6665	9	226643	0.0378309	0.504982
UBE2V2	2	6665	9	226643	0.0378309	0.504982
PBX1	5	6665	61	226643	0.0405112	0.504982
PDE11A	5	6665	61	226643	0.0405112	0.504982
ADCK4	3	6665	24	226643	0.0409463	0.504982
SIPA1L2	3	6665	24	226643	0.0409463	0.504982
KAZALD1	4	6665	42	226643	0.0420653	0.504982
ZC3HAV1	4	6665	42	226643	0.0420653	0.504982
ADAMTS9	2	6665	10	226643	0.0445514	0.504982
APOC1	2	6665	10	226643	0.0445514	0.504982
C3orf71	2	6665	10	226643	0.0445514	0.504982
DUSP7	2	6665	10	226643	0.0445514	0.504982
ERGIC3	2	6665	10	226643	0.0445514	0.504982
FBF1	2	6665	10	226643	0.0445514	0.504982
GNAI2	2	6665	10	226643	0.0445514	0.504982
HIVEP3	2	6665	10	226643	0.0445514	0.504982
SEPW1	2	6665	10	226643	0.0445514	0.504982
TOR1AIP1	2	6665	10	226643	0.0445514	0.504982
ACOX1	3	6665	25	226643	0.0449132	0.504982
PFKFB3	3	6665	25	226643	0.0449132	0.504982
NFAT5	10	6665	178	226643	0.0449589	0.504982
FBXL5	4	6665	43	226643	0.0449746	0.504982
GSPT1	3	6665	26	226643	0.0490631	0.504982
RHBDD3	3	6665	26	226643	0.0490631	0.504982
NXPH1	5	6665	65	226643	0.0500656	0.504982
AGA	2	6665	11	226643	0.0516732	0.504982
ARL8B	2	6665	11	226643	0.0516732	0.504982
EIF3A	2	6665	11	226643	0.0516732	0.504982
FXR2	2	6665	11	226643	0.0516732	0.504982
HOXB4	2	6665	11	226643	0.0516732	0.504982
KIAA1908	2	6665	11	226643	0.0516732	0.504982
LOXL1	2	6665	11	226643	0.0516732	0.504982
RAB10	2	6665	11	226643	0.0516732	0.504982
RFX7	2	6665	11	226643	0.0516732	0.504982
SLC37A4	2	6665	11	226643	0.0516732	0.504982
STAM2	2	6665	11	226643	0.0516732	0.504982
TTLL9	2	6665	11	226643	0.0516732	0.504982
NSD1	5	6665	66	226643	0.0526433	0.504982
BBC3	4	6665	46	226643	0.0543581	0.504982
TNPO3	4	6665	46	226643	0.0543581	0.504982
A2M	1	6665	1	226643	0.0563266	0.504982
ABCA9	1	6665	1	226643	0.0563266	0.504982
ABHD11	1	6665	1	226643	0.0563266	0.504982
ALPL	1	6665	1	226643	0.0563266	0.504982
ANGPTL1	1	6665	1	226643	0.0563266	0.504982
B4GALNT1	1	6665	1	226643	0.0563266	0.504982
BAALC	1	6665	1	226643	0.0563266	0.504982
BACE1	1	6665	1	226643	0.0563266	0.504982
BSN	1	6665	1	226643	0.0563266	0.504982
C12orf29	1	6665	1	226643	0.0563266	0.504982
C14orf23	1	6665	1	226643	0.0563266	0.504982
C20orf201	1	6665	1	226643	0.0563266	0.504982
CBX7	1	6665	1	226643	0.0563266	0.504982
CCBE1	1	6665	1	226643	0.0563266	0.504982
CD151	1	6665	1	226643	0.0563266	0.504982
CECR6	1	6665	1	226643	0.0563266	0.504982
CTSH	1	6665	1	226643	0.0563266	0.504982
DEXI	1	6665	1	226643	0.0563266	0.504982
DIRAS1	1	6665	1	226643	0.0563266	0.504982
DNAH5	1	6665	1	226643	0.0563266	0.504982
DYRK2	1	6665	1	226643	0.0563266	0.504982
FAM163A	1	6665	1	226643	0.0563266	0.504982
FAM194B	1	6665	1	226643	0.0563266	0.504982
FTH1	1	6665	1	226643	0.0563266	0.504982
FXC1	1	6665	1	226643	0.0563266	0.504982
GGTA1	1	6665	1	226643	0.0563266	0.504982
GPR172A	1	6665	1	226643	0.0563266	0.504982
GPR39	1	6665	1	226643	0.0563266	0.504982
GPR88	1	6665	1	226643	0.0563266	0.504982
GPRC5C	1	6665	1	226643	0.0563266	0.504982
GRM3	1	6665	1	226643	0.0563266	0.504982
GUCY2C	1	6665	1	226643	0.0563266	0.504982
HCN4	1	6665	1	226643	0.0563266	0.504982
HESRG	1	6665	1	226643	0.0563266	0.504982
HIGD2A	1	6665	1	226643	0.0563266	0.504982
HOXA13	1	6665	1	226643	0.0563266	0.504982
HOXB9	1	6665	1	226643	0.0563266	0.504982
HPGDS	1	6665	1	226643	0.0563266	0.504982
HR	1	6665	1	226643	0.0563266	0.504982
HTR6	1	6665	1	226643	0.0563266	0.504982
IDUA	1	6665	1	226643	0.0563266	0.504982
KCNK10	1	6665	1	226643	0.0563266	0.504982
KNDC1	1	6665	1	226643	0.0563266	0.504982
LOC400891	1	6665	1	226643	0.0563266	0.504982
LRP11	1	6665	1	226643	0.0563266	0.504982
MED10	1	6665	1	226643	0.0563266	0.504982
METTL6	1	6665	1	226643	0.0563266	0.504982
MFSD8	1	6665	1	226643	0.0563266	0.504982
MOBKL1B	1	6665	1	226643	0.0563266	0.504982
NAP1L1	1	6665	1	226643	0.0563266	0.504982
ODAM	1	6665	1	226643	0.0563266	0.504982
P2RY1	1	6665	1	226643	0.0563266	0.504982
P4HA3	1	6665	1	226643	0.0563266	0.504982
PADI2	1	6665	1	226643	0.0563266	0.504982
PCGEM1	1	6665	1	226643	0.0563266	0.504982
PCNXL3	1	6665	1	226643	0.0563266	0.504982
PDCL	1	6665	1	226643	0.0563266	0.504982
PDE4B	1	6665	1	226643	0.0563266	0.504982
PDIA6	1	6665	1	226643	0.0563266	0.504982
PKLR	1	6665	1	226643	0.0563266	0.504982
POLD4	1	6665	1	226643	0.0563266	0.504982
POU3F3	1	6665	1	226643	0.0563266	0.504982
PTPRT	1	6665	1	226643	0.0563266	0.504982
RAB38	1	6665	1	226643	0.0563266	0.504982
RAB3D	1	6665	1	226643	0.0563266	0.504982
RFTN1	1	6665	1	226643	0.0563266	0.504982
RNF113A	1	6665	1	226643	0.0563266	0.504982
RNF114	1	6665	1	226643	0.0563266	0.504982
RYK	1	6665	1	226643	0.0563266	0.504982
SBNO1	1	6665	1	226643	0.0563266	0.504982
SCARNA17	1	6665	1	226643	0.0563266	0.504982
SLC10A3	1	6665	1	226643	0.0563266	0.504982
SLC36A4	1	6665	1	226643	0.0563266	0.504982
SSNA1	1	6665	1	226643	0.0563266	0.504982
SULT4A1	1	6665	1	226643	0.0563266	0.504982
SYCP1	1	6665	1	226643	0.0563266	0.504982
SYNGR2	1	6665	1	226643	0.0563266	0.504982
SYPL2	1	6665	1	226643	0.0563266	0.504982
TAF4	1	6665	1	226643	0.0563266	0.504982
TERC	1	6665	1	226643	0.0563266	0.504982
TMEM54	1	6665	1	226643	0.0563266	0.504982
TRMT5	1	6665	1	226643	0.0563266	0.504982
UBE2Z	1	6665	1	226643	0.0563266	0.504982
VASH2	1	6665	1	226643	0.0563266	0.504982
WNT9A	1	6665	1	226643	0.0563266	0.504982
ZNF442	1	6665	1	226643	0.0563266	0.504982
CLK3	3	6665	28	226643	0.0578996	0.504982
GTF2E2	3	6665	28	226643	0.0578996	0.504982
MT1E	3	6665	28	226643	0.0578996	0.504982
PTPLAD1	3	6665	28	226643	0.0578996	0.504982
SYNGAP1	3	6665	28	226643	0.0578996	0.504982
ZNF689	3	6665	28	226643	0.0578996	0.504982
C2orf28	5	6665	68	226643	0.0580262	0.504982
ACAD11	2	6665	12	226643	0.0591681	0.504982
ARHGEF1	2	6665	12	226643	0.0591681	0.504982
BEST4	2	6665	12	226643	0.0591681	0.504982
CPXM1	2	6665	12	226643	0.0591681	0.504982
EEF2K	2	6665	12	226643	0.0591681	0.504982
FAM149B1	2	6665	12	226643	0.0591681	0.504982
FAM195A	2	6665	12	226643	0.0591681	0.504982
FARP2	2	6665	12	226643	0.0591681	0.504982
FLNA	2	6665	12	226643	0.0591681	0.504982
PAK2	2	6665	12	226643	0.0591681	0.504982
RAB31	2	6665	12	226643	0.0591681	0.504982
RNF10	2	6665	12	226643	0.0591681	0.504982
TANC1	2	6665	12	226643	0.0591681	0.504982
TULP3	2	6665	12	226643	0.0591681	0.504982
XKR3	2	6665	12	226643	0.0591681	0.504982
ITM2A	4	6665	48	226643	0.0611555	0.51795
MYH15	4	6665	48	226643	0.0611555	0.51795
PLXNC1	4	6665	48	226643	0.0611555	0.51795
RYR2	7	6665	115	226643	0.0614649	0.519246
ARID2	3	6665	29	226643	0.0625793	0.519408
CAMK2D	3	6665	29	226643	0.0625793	0.519408
FLJ39582	3	6665	29	226643	0.0625793	0.519408
GALNT10	3	6665	29	226643	0.0625793	0.519408
TMEM91	3	6665	29	226643	0.0625793	0.519408
YIF1B	3	6665	29	226643	0.0625793	0.519408
ZBTB45	3	6665	29	226643	0.0625793	0.519408
UGP2	7	6665	116	226643	0.0636426	0.524833
BAI3	5	6665	71	226643	0.0666676	0.524833
C21orf58	2	6665	13	226643	0.0670088	0.524833
GPI	2	6665	13	226643	0.0670088	0.524833
PDPK1	2	6665	13	226643	0.0670088	0.524833
PLEKHM3	2	6665	13	226643	0.0670088	0.524833
XRCC4	2	6665	13	226643	0.0670088	0.524833
C4orf52	3	6665	30	226643	0.0674283	0.524833
EPB41L3	3	6665	30	226643	0.0674283	0.524833
GPR126	3	6665	30	226643	0.0674283	0.524833
PRMT2	3	6665	30	226643	0.0674283	0.524833
ZNF688	3	6665	30	226643	0.0674283	0.524833
NUBPL	7	6665	118	226643	0.0681365	0.524833
USP3	4	6665	50	226643	0.0683794	0.524833
ELF2	4	6665	51	226643	0.0721488	0.524833
RNF207	4	6665	51	226643	0.0721488	0.524833
NKX2-2	3	6665	31	226643	0.0724426	0.524833
TXNDC15	3	6665	31	226643	0.0724426	0.524833
XPO1	3	6665	31	226643	0.0724426	0.524833
BMF	5	6665	73	226643	0.0728041	0.524833
C16orf72	2	6665	14	226643	0.0751695	0.524833
DOCK1	2	6665	14	226643	0.0751695	0.524833
ELAVL2	2	6665	14	226643	0.0751695	0.524833
FAM116A	2	6665	14	226643	0.0751695	0.524833
FBXW11	2	6665	14	226643	0.0751695	0.524833
GMPR2	2	6665	14	226643	0.0751695	0.524833
HMGCL	2	6665	14	226643	0.0751695	0.524833
IMPG1	2	6665	14	226643	0.0751695	0.524833
MFHAS1	2	6665	14	226643	0.0751695	0.524833
SLC43A3	2	6665	14	226643	0.0751695	0.524833
STOX2	2	6665	14	226643	0.0751695	0.524833
TATDN2	2	6665	14	226643	0.0751695	0.524833
C11orf48	4	6665	52	226643	0.0760218	0.524833
THAP4	4	6665	52	226643	0.0760218	0.524833
ZBTB7B	4	6665	52	226643	0.0760218	0.524833
C10orf95	3	6665	32	226643	0.0776181	0.524833
FAM13A	6	6665	99	226643	0.081033	0.524833
ABCB5	1	6665	2	226643	0.0832886	0.524833
ACHE	1	6665	2	226643	0.0832886	0.524833
ADAMTSL5	1	6665	2	226643	0.0832886	0.524833
ADCK5	1	6665	2	226643	0.0832886	0.524833
AK5	1	6665	2	226643	0.0832886	0.524833
AMN1	1	6665	2	226643	0.0832886	0.524833
ARHGAP4	1	6665	2	226643	0.0832886	0.524833
ATP6V0B	1	6665	2	226643	0.0832886	0.524833
BBS10	1	6665	2	226643	0.0832886	0.524833
C16orf58	1	6665	2	226643	0.0832886	0.524833
C9orf40	1	6665	2	226643	0.0832886	0.524833
C9orf44	1	6665	2	226643	0.0832886	0.524833
CCT6A	1	6665	2	226643	0.0832886	0.524833
CDK5R1	1	6665	2	226643	0.0832886	0.524833
CEBPD	1	6665	2	226643	0.0832886	0.524833
CHKA	1	6665	2	226643	0.0832886	0.524833
CRK	1	6665	2	226643	0.0832886	0.524833
CYP4V2	1	6665	2	226643	0.0832886	0.524833
DHDPSL	1	6665	2	226643	0.0832886	0.524833
EDAR	1	6665	2	226643	0.0832886	0.524833
F5	1	6665	2	226643	0.0832886	0.524833
FAM128B	1	6665	2	226643	0.0832886	0.524833
FAM129C	1	6665	2	226643	0.0832886	0.524833
FMO2	1	6665	2	226643	0.0832886	0.524833
FOXN4	1	6665	2	226643	0.0832886	0.524833
GNA12	1	6665	2	226643	0.0832886	0.524833
HIST1H2AK	1	6665	2	226643	0.0832886	0.524833
HSD17B4	1	6665	2	226643	0.0832886	0.524833
JAKMIP1	1	6665	2	226643	0.0832886	0.524833
KCND3	1	6665	2	226643	0.0832886	0.524833
KCNQ4	1	6665	2	226643	0.0832886	0.524833
KIAA1712	1	6665	2	226643	0.0832886	0.524833
KIDINS220	1	6665	2	226643	0.0832886	0.524833
LOC100129726	1	6665	2	226643	0.0832886	0.524833
LOC220930	1	6665	2	226643	0.0832886	0.524833
MANBA	1	6665	2	226643	0.0832886	0.524833
MDGA1	1	6665	2	226643	0.0832886	0.524833
MESDC1	1	6665	2	226643	0.0832886	0.524833
NDEL1	1	6665	2	226643	0.0832886	0.524833
NMU	1	6665	2	226643	0.0832886	0.524833
NUP35	1	6665	2	226643	0.0832886	0.524833
OPCML	1	6665	2	226643	0.0832886	0.524833
PARG	1	6665	2	226643	0.0832886	0.524833
PDCD10	1	6665	2	226643	0.0832886	0.524833
POC1B	1	6665	2	226643	0.0832886	0.524833
POLR2B	1	6665	2	226643	0.0832886	0.524833
PRPF6	1	6665	2	226643	0.0832886	0.524833
PRRG4	1	6665	2	226643	0.0832886	0.524833
RAB43	1	6665	2	226643	0.0832886	0.524833
RAP2B	1	6665	2	226643	0.0832886	0.524833
RCSD1	1	6665	2	226643	0.0832886	0.524833
RNF217	1	6665	2	226643	0.0832886	0.524833
RPGR	1	6665	2	226643	0.0832886	0.524833
RTN4RL2	1	6665	2	226643	0.0832886	0.524833
SCN5A	1	6665	2	226643	0.0832886	0.524833
SCYL1	1	6665	2	226643	0.0832886	0.524833
SDHAP3	1	6665	2	226643	0.0832886	0.524833
SHROOM1	1	6665	2	226643	0.0832886	0.524833
SOCS1	1	6665	2	226643	0.0832886	0.524833
SUB1	1	6665	2	226643	0.0832886	0.524833
SYNM	1	6665	2	226643	0.0832886	0.524833
TNFRSF10D	1	6665	2	226643	0.0832886	0.524833
TOP2B	1	6665	2	226643	0.0832886	0.524833
TTC13	1	6665	2	226643	0.0832886	0.524833
TTC16	1	6665	2	226643	0.0832886	0.524833
UBE2B	1	6665	2	226643	0.0832886	0.524833
UBE2L6	1	6665	2	226643	0.0832886	0.524833
USP51	1	6665	2	226643	0.0832886	0.524833
ZFPL1	1	6665	2	226643	0.0832886	0.524833
ZFPM2	1	6665	2	226643	0.0832886	0.524833
ZNF10	1	6665	2	226643	0.0832886	0.524833
ZNF607	1	6665	2	226643	0.0832886	0.524833
ZNF764	1	6665	2	226643	0.0832886	0.524833
C15orf27	2	6665	15	226643	0.0836254	0.524833
C21orf33	2	6665	15	226643	0.0836254	0.524833
CAMKK2	2	6665	15	226643	0.0836254	0.524833
CAPN2	2	6665	15	226643	0.0836254	0.524833
CCDC18	2	6665	15	226643	0.0836254	0.524833
GRIN2D	2	6665	15	226643	0.0836254	0.524833
HEXA	2	6665	15	226643	0.0836254	0.524833
HOXA11AS	2	6665	15	226643	0.0836254	0.524833
MARCH6	2	6665	15	226643	0.0836254	0.524833
MTCP1	2	6665	15	226643	0.0836254	0.524833
MTCP1NB	2	6665	15	226643	0.0836254	0.524833
PSMF1	2	6665	15	226643	0.0836254	0.524833
QSER1	2	6665	15	226643	0.0836254	0.524833
SEPT10	2	6665	15	226643	0.0836254	0.524833
SHMT1	2	6665	15	226643	0.0836254	0.524833
SHMT2	2	6665	15	226643	0.0836254	0.524833
TRIM8	2	6665	15	226643	0.0836254	0.524833
WDR34	2	6665	15	226643	0.0836254	0.524833
ZNF335	2	6665	15	226643	0.0836254	0.524833
RALYL	5	6665	77	226643	0.0859647	0.538496
LARGE	4	6665	55	226643	0.0882488	0.543806
CDKN2A	3	6665	34	226643	0.0884348	0.543806
USH2A	5	6665	78	226643	0.0894367	0.543806
ACTR3B	2	6665	16	226643	0.0923531	0.543806
ANKRD31	2	6665	16	226643	0.0923531	0.543806
C6orf108	2	6665	16	226643	0.0923531	0.543806
CNOT6	2	6665	16	226643	0.0923531	0.543806
CWC27	2	6665	16	226643	0.0923531	0.543806
DDX6	2	6665	16	226643	0.0923531	0.543806
KIAA0114	2	6665	16	226643	0.0923531	0.543806
MND1	2	6665	16	226643	0.0923531	0.543806
SH3PXD2B	2	6665	16	226643	0.0923531	0.543806
SMAD4	2	6665	16	226643	0.0923531	0.543806
TGFB1	2	6665	16	226643	0.0923531	0.543806
TMEM123	2	6665	16	226643	0.0923531	0.543806
ZBED5	2	6665	16	226643	0.0923531	0.543806
AFF3	3	6665	35	226643	0.0940671	0.543806
DET1	3	6665	35	226643	0.0940671	0.543806
SEPT6	3	6665	35	226643	0.0940671	0.543806
TBC1D5	5	6665	80	226643	0.0965948	0.543806
GNAO1	4	6665	57	226643	0.0968923	0.543806
FGFR1	7	6665	130	226643	0.0989732	0.543806
C17orf48	3	6665	36	226643	0.0998423	0.543806
ZCCHC7	3	6665	36	226643	0.0998423	0.543806
C6orf10	2	6665	17	226643	0.10133	0.543806
CCDC57	2	6665	17	226643	0.10133	0.543806
CCDC58	2	6665	17	226643	0.10133	0.543806
CCNY	2	6665	17	226643	0.10133	0.543806
CDK17	2	6665	17	226643	0.10133	0.543806
E2F3	2	6665	17	226643	0.10133	0.543806
FAM55C	2	6665	17	226643	0.10133	0.543806
FLJ13224	2	6665	17	226643	0.10133	0.543806
IQCJ	2	6665	17	226643	0.10133	0.543806
JOSD1	2	6665	17	226643	0.10133	0.543806
KIAA0226	2	6665	17	226643	0.10133	0.543806
TMPO	2	6665	17	226643	0.10133	0.543806
PRKAR2A	3	6665	37	226643	0.105756	0.543806
LPHN3	5	6665	83	226643	0.107855	0.543806
ACSF3	1	6665	3	226643	0.10948	0.543806
ADAP1	1	6665	3	226643	0.10948	0.543806
ALCAM	1	6665	3	226643	0.10948	0.543806
ALLC	1	6665	3	226643	0.10948	0.543806
ALPK3	1	6665	3	226643	0.10948	0.543806
ARL4C	1	6665	3	226643	0.10948	0.543806
ATMIN	1	6665	3	226643	0.10948	0.543806
B4GALT3	1	6665	3	226643	0.10948	0.543806
BNIP3	1	6665	3	226643	0.10948	0.543806
C17orf85	1	6665	3	226643	0.10948	0.543806
C19orf6	1	6665	3	226643	0.10948	0.543806
C2orf88	1	6665	3	226643	0.10948	0.543806
C9orf6	1	6665	3	226643	0.10948	0.543806
CA13	1	6665	3	226643	0.10948	0.543806
CCDC39	1	6665	3	226643	0.10948	0.543806
CCDC61	1	6665	3	226643	0.10948	0.543806
CCNI	1	6665	3	226643	0.10948	0.543806
DDX58	1	6665	3	226643	0.10948	0.543806
DEPDC7	1	6665	3	226643	0.10948	0.543806
DRAM2	1	6665	3	226643	0.10948	0.543806
DYNC1H1	1	6665	3	226643	0.10948	0.543806
EGF	1	6665	3	226643	0.10948	0.543806
EID2	1	6665	3	226643	0.10948	0.543806
EIF3H	1	6665	3	226643	0.10948	0.543806
EMILIN3	1	6665	3	226643	0.10948	0.543806
EXOSC6	1	6665	3	226643	0.10948	0.543806
EYA1	1	6665	3	226643	0.10948	0.543806
FAM104A	1	6665	3	226643	0.10948	0.543806
FAM161A	1	6665	3	226643	0.10948	0.543806
FBXL12	1	6665	3	226643	0.10948	0.543806
FES	1	6665	3	226643	0.10948	0.543806
FGD3	1	6665	3	226643	0.10948	0.543806
FZD1	1	6665	3	226643	0.10948	0.543806
GAMT	1	6665	3	226643	0.10948	0.543806
GFPT2	1	6665	3	226643	0.10948	0.543806
GRIP1	1	6665	3	226643	0.10948	0.543806
GUCA1C	1	6665	3	226643	0.10948	0.543806
HELT	1	6665	3	226643	0.10948	0.543806
ISLR2	1	6665	3	226643	0.10948	0.543806
ITIH5L	1	6665	3	226643	0.10948	0.543806
KANK2	1	6665	3	226643	0.10948	0.543806
KIAA1632	1	6665	3	226643	0.10948	0.543806
KLC2	1	6665	3	226643	0.10948	0.543806
KLHL21	1	6665	3	226643	0.10948	0.543806
KLHL25	1	6665	3	226643	0.10948	0.543806
LGALS3	1	6665	3	226643	0.10948	0.543806
LOC100133991	1	6665	3	226643	0.10948	0.543806
LOC26102	1	6665	3	226643	0.10948	0.543806
LOC80054	1	6665	3	226643	0.10948	0.543806
LPAR3	1	6665	3	226643	0.10948	0.543806
LPCAT3	1	6665	3	226643	0.10948	0.543806
LPO	1	6665	3	226643	0.10948	0.543806
LQK1	1	6665	3	226643	0.10948	0.543806
MALT1	1	6665	3	226643	0.10948	0.543806
MAP4K1	1	6665	3	226643	0.10948	0.543806
MBTD1	1	6665	3	226643	0.10948	0.543806
MEA1	1	6665	3	226643	0.10948	0.543806
MEGF6	1	6665	3	226643	0.10948	0.543806
MPZ	1	6665	3	226643	0.10948	0.543806
NCRNA00245	1	6665	3	226643	0.10948	0.543806
NIT1	1	6665	3	226643	0.10948	0.543806
NKPD1	1	6665	3	226643	0.10948	0.543806
NKX6-1	1	6665	3	226643	0.10948	0.543806
OPTN	1	6665	3	226643	0.10948	0.543806
PAX2	1	6665	3	226643	0.10948	0.543806
PIH1D2	1	6665	3	226643	0.10948	0.543806
PIWIL2	1	6665	3	226643	0.10948	0.543806
PLCG1	1	6665	3	226643	0.10948	0.543806
PSORS1C1	1	6665	3	226643	0.10948	0.543806
RAB11FIP5	1	6665	3	226643	0.10948	0.543806
RELL2	1	6665	3	226643	0.10948	0.543806
SCUBE1	1	6665	3	226643	0.10948	0.543806
SEMA4F	1	6665	3	226643	0.10948	0.543806
SLC30A1	1	6665	3	226643	0.10948	0.543806
SLC4A4	1	6665	3	226643	0.10948	0.543806
SMPD4	1	6665	3	226643	0.10948	0.543806
SPATA2	1	6665	3	226643	0.10948	0.543806
SPIN2B	1	6665	3	226643	0.10948	0.543806
ST7OT1	1	6665	3	226643	0.10948	0.543806
STEAP3	1	6665	3	226643	0.10948	0.543806
STK32C	1	6665	3	226643	0.10948	0.543806
TLX1	1	6665	3	226643	0.10948	0.543806
TMBIM6	1	6665	3	226643	0.10948	0.543806
TSFM	1	6665	3	226643	0.10948	0.543806
TSGA13	1	6665	3	226643	0.10948	0.543806
VEPH1	1	6665	3	226643	0.10948	0.543806
VPS4A	1	6665	3	226643	0.10948	0.543806
WDR24	1	6665	3	226643	0.10948	0.543806
WNT10A	1	6665	3	226643	0.10948	0.543806
YBX1	1	6665	3	226643	0.10948	0.543806
YIPF2	1	6665	3	226643	0.10948	0.543806
YY1AP1	1	6665	3	226643	0.10948	0.543806
ZFAND1	1	6665	3	226643	0.10948	0.543806
ZNF140	1	6665	3	226643	0.10948	0.543806
ZNF205	1	6665	3	226643	0.10948	0.543806
ZNF514	1	6665	3	226643	0.10948	0.543806
ZNF695	1	6665	3	226643	0.10948	0.543806
PCYT1B	8	6665	160	226643	0.110343	0.543806
CDC20B	2	6665	18	226643	0.110535	0.543806
DHTKD1	2	6665	18	226643	0.110535	0.543806
LOC153684	2	6665	18	226643	0.110535	0.543806
MITF	2	6665	18	226643	0.110535	0.543806
NSUN6	2	6665	18	226643	0.110535	0.543806
PGM2L1	2	6665	18	226643	0.110535	0.543806
VPS4B	2	6665	18	226643	0.110535	0.543806
ZNF341	2	6665	18	226643	0.110535	0.543806
BCL9	4	6665	60	226643	0.110563	0.543806
AUTS2	10	6665	214	226643	0.111188	0.546073
HIP1	3	6665	38	226643	0.111803	0.546663
RREB1	3	6665	38	226643	0.111803	0.546663
TNR	3	6665	38	226643	0.111803	0.546663
IER2	4	6665	61	226643	0.115301	0.560256
HIBADH	8	6665	162	226643	0.115894	0.560256
LOC285696	3	6665	39	226643	0.117978	0.560256
SLC44A1	3	6665	39	226643	0.117978	0.560256
SLC7A6	3	6665	39	226643	0.117978	0.560256
ZCCHC2	3	6665	39	226643	0.117978	0.560256
AS3MT	2	6665	19	226643	0.119948	0.560256
GRB2	2	6665	19	226643	0.119948	0.560256
HOXA11	2	6665	19	226643	0.119948	0.560256
SLC35F5	2	6665	19	226643	0.119948	0.560256
STARD9	2	6665	19	226643	0.119948	0.560256
LOC100129387	4	6665	62	226643	0.120126	0.560256
GRM8	5	6665	87	226643	0.123811	0.560256
ANXA1	4	6665	63	226643	0.125036	0.560256
BTBD9	2	6665	20	226643	0.129548	0.560256
C18orf55	2	6665	20	226643	0.129548	0.560256
C5orf41	2	6665	20	226643	0.129548	0.560256
MSL1	2	6665	20	226643	0.129548	0.560256
PRLR	2	6665	20	226643	0.129548	0.560256
PRRT2	2	6665	20	226643	0.129548	0.560256
SMCR8	2	6665	20	226643	0.129548	0.560256
TG	2	6665	20	226643	0.129548	0.560256
ACBD4	1	6665	4	226643	0.134923	0.560256
AIG1	1	6665	4	226643	0.134923	0.560256
ALKBH1	1	6665	4	226643	0.134923	0.560256
ANXA11	1	6665	4	226643	0.134923	0.560256
ASL	1	6665	4	226643	0.134923	0.560256
ATG4D	1	6665	4	226643	0.134923	0.560256
BCKDHA	1	6665	4	226643	0.134923	0.560256
C11orf46	1	6665	4	226643	0.134923	0.560256
C16orf42	1	6665	4	226643	0.134923	0.560256
C1orf58	1	6665	4	226643	0.134923	0.560256
C8orf37	1	6665	4	226643	0.134923	0.560256
CASKIN2	1	6665	4	226643	0.134923	0.560256
CCNL1	1	6665	4	226643	0.134923	0.560256
CD68	1	6665	4	226643	0.134923	0.560256
CDADC1	1	6665	4	226643	0.134923	0.560256
CHST6	1	6665	4	226643	0.134923	0.560256
CLINT1	1	6665	4	226643	0.134923	0.560256
CPE	1	6665	4	226643	0.134923	0.560256
CTSL3	1	6665	4	226643	0.134923	0.560256
CTSZ	1	6665	4	226643	0.134923	0.560256
DBNL	1	6665	4	226643	0.134923	0.560256
DNM2	1	6665	4	226643	0.134923	0.560256
DSE	1	6665	4	226643	0.134923	0.560256
EHD4	1	6665	4	226643	0.134923	0.560256
EMD	1	6665	4	226643	0.134923	0.560256
FAM178A	1	6665	4	226643	0.134923	0.560256
FAM38A	1	6665	4	226643	0.134923	0.560256
FAM76A	1	6665	4	226643	0.134923	0.560256
FBXL16	1	6665	4	226643	0.134923	0.560256
FBXL19	1	6665	4	226643	0.134923	0.560256
FGR	1	6665	4	226643	0.134923	0.560256
FJX1	1	6665	4	226643	0.134923	0.560256
FRMPD2	1	6665	4	226643	0.134923	0.560256
GK5	1	6665	4	226643	0.134923	0.560256
GLA	1	6665	4	226643	0.134923	0.560256
HIC1	1	6665	4	226643	0.134923	0.560256
HMGN3	1	6665	4	226643	0.134923	0.560256
IFLTD1	1	6665	4	226643	0.134923	0.560256
IL15RA	1	6665	4	226643	0.134923	0.560256
JUND	1	6665	4	226643	0.134923	0.560256
LACTB2	1	6665	4	226643	0.134923	0.560256
LINGO2	1	6665	4	226643	0.134923	0.560256
LOC100133957	1	6665	4	226643	0.134923	0.560256
LOC25845	1	6665	4	226643	0.134923	0.560256
LTBP1	1	6665	4	226643	0.134923	0.560256
MASP2	1	6665	4	226643	0.134923	0.560256
MOGS	1	6665	4	226643	0.134923	0.560256
NGFRAP1	1	6665	4	226643	0.134923	0.560256
NOG	1	6665	4	226643	0.134923	0.560256
NOXA1	1	6665	4	226643	0.134923	0.560256
NR3C2	1	6665	4	226643	0.134923	0.560256
NT5C	1	6665	4	226643	0.134923	0.560256
P2RX4	1	6665	4	226643	0.134923	0.560256
PCYT2	1	6665	4	226643	0.134923	0.560256
PLD4	1	6665	4	226643	0.134923	0.560256
PPAPDC3	1	6665	4	226643	0.134923	0.560256
PRUNE2	1	6665	4	226643	0.134923	0.560256
PTPN18	1	6665	4	226643	0.134923	0.560256
PURA	1	6665	4	226643	0.134923	0.560256
PXMP2	1	6665	4	226643	0.134923	0.560256
RARRES1	1	6665	4	226643	0.134923	0.560256
RBBP6	1	6665	4	226643	0.134923	0.560256
RGS13	1	6665	4	226643	0.134923	0.560256
RORC	1	6665	4	226643	0.134923	0.560256
SERPINA11	1	6665	4	226643	0.134923	0.560256
SETD1A	1	6665	4	226643	0.134923	0.560256
SIRT3	1	6665	4	226643	0.134923	0.560256
SLC39A6	1	6665	4	226643	0.134923	0.560256
SLMO2	1	6665	4	226643	0.134923	0.560256
SOX4	1	6665	4	226643	0.134923	0.560256
SSH1	1	6665	4	226643	0.134923	0.560256
SYCP2L	1	6665	4	226643	0.134923	0.560256
TDH	1	6665	4	226643	0.134923	0.560256
TMEM180	1	6665	4	226643	0.134923	0.560256
TMEM204	1	6665	4	226643	0.134923	0.560256
TRAF6	1	6665	4	226643	0.134923	0.560256
UBAC1	1	6665	4	226643	0.134923	0.560256
UFSP2	1	6665	4	226643	0.134923	0.560256
ZC3H14	1	6665	4	226643	0.134923	0.560256
ZDHHC23	1	6665	4	226643	0.134923	0.560256
ZNF251	1	6665	4	226643	0.134923	0.560256
ZNF446	1	6665	4	226643	0.134923	0.560256
ZNF480	1	6665	4	226643	0.134923	0.560256
ZNF557	1	6665	4	226643	0.134923	0.560256
ZNF562	1	6665	4	226643	0.134923	0.560256
ZNF674	1	6665	4	226643	0.134923	0.560256
ZNF831	1	6665	4	226643	0.134923	0.560256
CASC2	3	6665	42	226643	0.137224	0.560256
SETD5	3	6665	42	226643	0.137224	0.560256
ARID1A	2	6665	21	226643	0.139319	0.560256
C14orf181	2	6665	21	226643	0.139319	0.560256
C8orf55	2	6665	21	226643	0.139319	0.560256
EP300	2	6665	21	226643	0.139319	0.560256
LRRC7	2	6665	21	226643	0.139319	0.560256
RASGRF1	2	6665	21	226643	0.139319	0.560256
SMARCAD1	2	6665	21	226643	0.139319	0.560256
YWHAZ	2	6665	21	226643	0.139319	0.560256
LOC100131691	4	6665	66	226643	0.140259	0.560256
LRFN5	4	6665	66	226643	0.140259	0.560256
MLLT11	4	6665	66	226643	0.140259	0.560256
AKT1S1	3	6665	43	226643	0.143863	0.560256
JAM2	3	6665	43	226643	0.143863	0.560256
MLLT10	3	6665	43	226643	0.143863	0.560256
FTO	6	6665	119	226643	0.149181	0.560256
CCR10	2	6665	22	226643	0.149241	0.560256
HECTD2	2	6665	22	226643	0.149241	0.560256
HPCAL1	2	6665	22	226643	0.149241	0.560256
MINPP1	2	6665	22	226643	0.149241	0.560256
NKTR	2	6665	22	226643	0.149241	0.560256
PDXK	2	6665	22	226643	0.149241	0.560256
PHF23	2	6665	22	226643	0.149241	0.560256
PTPN2	2	6665	22	226643	0.149241	0.560256
RAGE	2	6665	22	226643	0.149241	0.560256
RPA3	2	6665	22	226643	0.149241	0.560256
COL4A3	5	6665	93	226643	0.149629	0.560256
SMARCA2	5	6665	93	226643	0.149629	0.560256
C11orf80	3	6665	44	226643	0.150605	0.560256
NUDT3	3	6665	44	226643	0.150605	0.560256
FGF13	4	6665	68	226643	0.150795	0.560256
LRRTM4	4	6665	68	226643	0.150795	0.560256
SECISBP2L	4	6665	69	226643	0.156173	0.560256
TRIM54	4	6665	69	226643	0.156173	0.560256
CHN1	13	6665	318	226643	0.157034	0.560256
MYRIP	6	6665	121	226643	0.1571	0.560256
STAU2	7	6665	148	226643	0.157107	0.560256
UHRF1	3	6665	45	226643	0.157446	0.560256
DUSP9	2	6665	23	226643	0.1593	0.560256
EPHA7	2	6665	23	226643	0.1593	0.560256
KLF13	2	6665	23	226643	0.1593	0.560256
PKNOX1	2	6665	23	226643	0.1593	0.560256
WDR45	2	6665	23	226643	0.1593	0.560256
ACAD10	1	6665	5	226643	0.159639	0.560256
AKAP5	1	6665	5	226643	0.159639	0.560256
AKNAD1	1	6665	5	226643	0.159639	0.560256
ALDH3A1	1	6665	5	226643	0.159639	0.560256
ANKRD13D	1	6665	5	226643	0.159639	0.560256
ANKRD28	1	6665	5	226643	0.159639	0.560256
AP1G2	1	6665	5	226643	0.159639	0.560256
ARHGEF37	1	6665	5	226643	0.159639	0.560256
ARRDC1	1	6665	5	226643	0.159639	0.560256
B9D2	1	6665	5	226643	0.159639	0.560256
BAG3	1	6665	5	226643	0.159639	0.560256
BTBD19	1	6665	5	226643	0.159639	0.560256
C12orf5	1	6665	5	226643	0.159639	0.560256
C16orf73	1	6665	5	226643	0.159639	0.560256
C17orf65	1	6665	5	226643	0.159639	0.560256
C1orf212	1	6665	5	226643	0.159639	0.560256
C5orf62	1	6665	5	226643	0.159639	0.560256
C9orf153	1	6665	5	226643	0.159639	0.560256
CBY3	1	6665	5	226643	0.159639	0.560256
CCDC141	1	6665	5	226643	0.159639	0.560256
CCDC86	1	6665	5	226643	0.159639	0.560256
CCND2	1	6665	5	226643	0.159639	0.560256
CCNDBP1	1	6665	5	226643	0.159639	0.560256
CHODL	1	6665	5	226643	0.159639	0.560256
CIR1	1	6665	5	226643	0.159639	0.560256
CMAS	1	6665	5	226643	0.159639	0.560256
COL21A1	1	6665	5	226643	0.159639	0.560256
CRISPLD2	1	6665	5	226643	0.159639	0.560256
CRTC1	1	6665	5	226643	0.159639	0.560256
DENND4B	1	6665	5	226643	0.159639	0.560256
DFNA5	1	6665	5	226643	0.159639	0.560256
DLEU7	1	6665	5	226643	0.159639	0.560256
DUSP12	1	6665	5	226643	0.159639	0.560256
EPHB2	1	6665	5	226643	0.159639	0.560256
EPRS	1	6665	5	226643	0.159639	0.560256
FAM126B	1	6665	5	226643	0.159639	0.560256
FAM98C	1	6665	5	226643	0.159639	0.560256
FBXL6	1	6665	5	226643	0.159639	0.560256
GAS2L3	1	6665	5	226643	0.159639	0.560256
GLRX3	1	6665	5	226643	0.159639	0.560256
GPR63	1	6665	5	226643	0.159639	0.560256
H2AFY2	1	6665	5	226643	0.159639	0.560256
HSD17B2	1	6665	5	226643	0.159639	0.560256
INHBE	1	6665	5	226643	0.159639	0.560256
ITGB2	1	6665	5	226643	0.159639	0.560256
KCTD2	1	6665	5	226643	0.159639	0.560256
KIAA0317	1	6665	5	226643	0.159639	0.560256
KIAA1751	1	6665	5	226643	0.159639	0.560256
KLHDC10	1	6665	5	226643	0.159639	0.560256
KRAS	1	6665	5	226643	0.159639	0.560256
LCP1	1	6665	5	226643	0.159639	0.560256
LOC63930	1	6665	5	226643	0.159639	0.560256
LYAR	1	6665	5	226643	0.159639	0.560256
MAGT1	1	6665	5	226643	0.159639	0.560256
MAP3K6	1	6665	5	226643	0.159639	0.560256
MAPK12	1	6665	5	226643	0.159639	0.560256
MARVELD1	1	6665	5	226643	0.159639	0.560256
MIIP	1	6665	5	226643	0.159639	0.560256
MRPL43	1	6665	5	226643	0.159639	0.560256
MTAP	1	6665	5	226643	0.159639	0.560256
N4BP2L1	1	6665	5	226643	0.159639	0.560256
NAB2	1	6665	5	226643	0.159639	0.560256
NUDCD3	1	6665	5	226643	0.159639	0.560256
OPLAH	1	6665	5	226643	0.159639	0.560256
OSGIN1	1	6665	5	226643	0.159639	0.560256
PABPC1L	1	6665	5	226643	0.159639	0.560256
PACSIN3	1	6665	5	226643	0.159639	0.560256
PCGF1	1	6665	5	226643	0.159639	0.560256
PDE4A	1	6665	5	226643	0.159639	0.560256
PGRMC2	1	6665	5	226643	0.159639	0.560256
PLEKHO1	1	6665	5	226643	0.159639	0.560256
PLIN1	1	6665	5	226643	0.159639	0.560256
POLG	1	6665	5	226643	0.159639	0.560256
POLK	1	6665	5	226643	0.159639	0.560256
POLM	1	6665	5	226643	0.159639	0.560256
PTENP1	1	6665	5	226643	0.159639	0.560256
PTPN1	1	6665	5	226643	0.159639	0.560256
PUS10	1	6665	5	226643	0.159639	0.560256
RBM45	1	6665	5	226643	0.159639	0.560256
RER1	1	6665	5	226643	0.159639	0.560256
RHBDF2	1	6665	5	226643	0.159639	0.560256
RNF166	1	6665	5	226643	0.159639	0.560256
SAMD10	1	6665	5	226643	0.159639	0.560256
SCML1	1	6665	5	226643	0.159639	0.560256
SCRIB	1	6665	5	226643	0.159639	0.560256
SEMA4C	1	6665	5	226643	0.159639	0.560256
SGSH	1	6665	5	226643	0.159639	0.560256
SIAH2	1	6665	5	226643	0.159639	0.560256
SLC2A3	1	6665	5	226643	0.159639	0.560256
SLC5A8	1	6665	5	226643	0.159639	0.560256
TBX2	1	6665	5	226643	0.159639	0.560256
TBXAS1	1	6665	5	226643	0.159639	0.560256
TECPR1	1	6665	5	226643	0.159639	0.560256
TLCD1	1	6665	5	226643	0.159639	0.560256
TLE4	1	6665	5	226643	0.159639	0.560256
TMEM27	1	6665	5	226643	0.159639	0.560256
TNIP1	1	6665	5	226643	0.159639	0.560256
TP73	1	6665	5	226643	0.159639	0.560256
TRIB3	1	6665	5	226643	0.159639	0.560256
TRIM4	1	6665	5	226643	0.159639	0.560256
TTC32	1	6665	5	226643	0.159639	0.560256
UNG	1	6665	5	226643	0.159639	0.560256
VPS33B	1	6665	5	226643	0.159639	0.560256
WWC1	1	6665	5	226643	0.159639	0.560256
YIF1A	1	6665	5	226643	0.159639	0.560256
ZBTB16	1	6665	5	226643	0.159639	0.560256
ZBTB44	1	6665	5	226643	0.159639	0.560256
ZNF22	1	6665	5	226643	0.159639	0.560256
ZNF444	1	6665	5	226643	0.159639	0.560256
ZNF529	1	6665	5	226643	0.159639	0.560256
ZNF546	1	6665	5	226643	0.159639	0.560256
ZNF624	1	6665	5	226643	0.159639	0.560256
ZNF655	1	6665	5	226643	0.159639	0.560256
ZNF684	1	6665	5	226643	0.159639	0.560256
DNAJA2	4	6665	70	226643	0.161621	0.566015
GALK2	4	6665	70	226643	0.161621	0.566015
HS6ST2	3	6665	46	226643	0.16438	0.568234
LHCGR	3	6665	46	226643	0.16438	0.568234
SPAG9	9	6665	206	226643	0.165026	0.568234
PPP3CA	5	6665	97	226643	0.167993	0.568234
ATXN3	2	6665	24	226643	0.169477	0.568234
INPP4A	2	6665	24	226643	0.169477	0.568234
KIAA0182	2	6665	24	226643	0.169477	0.568234
METTL12	2	6665	24	226643	0.169477	0.568234
MPG	2	6665	24	226643	0.169477	0.568234
N4BP2	2	6665	24	226643	0.169477	0.568234
PRR25	2	6665	24	226643	0.169477	0.568234
TADA2A	2	6665	24	226643	0.169477	0.568234
UBAP1	2	6665	24	226643	0.169477	0.568234
UBE2D2	2	6665	24	226643	0.169477	0.568234
PTPRD	23	6665	624	226643	0.170682	0.568234
FAM134B	3	6665	47	226643	0.171403	0.568234
NMNAT2	4	6665	72	226643	0.172719	0.568234
MECOM	11	6665	266	226643	0.172868	0.568234
CRADD	8	6665	181	226643	0.175618	0.568234
C8orf45	3	6665	48	226643	0.178509	0.568234
IFT88	3	6665	48	226643	0.178509	0.568234
RAD51L1	3	6665	48	226643	0.178509	0.568234
TMEM146	3	6665	48	226643	0.178509	0.568234
ABHD14B	2	6665	25	226643	0.17976	0.568234
ANKRD40	2	6665	25	226643	0.17976	0.568234
MMAB	2	6665	25	226643	0.17976	0.568234
PHKA1	2	6665	25	226643	0.17976	0.568234
PLEKHG4	2	6665	25	226643	0.17976	0.568234
RFTN2	2	6665	25	226643	0.17976	0.568234
RUFY3	2	6665	25	226643	0.17976	0.568234
ST6GAL1	2	6665	25	226643	0.17976	0.568234
ZNF407	2	6665	25	226643	0.17976	0.568234
ADAMTS1	1	6665	6	226643	0.183649	0.568234
ANKRD13C	1	6665	6	226643	0.183649	0.568234
ATP5I	1	6665	6	226643	0.183649	0.568234
B3GNTL1	1	6665	6	226643	0.183649	0.568234
BCL2L2	1	6665	6	226643	0.183649	0.568234
BID	1	6665	6	226643	0.183649	0.568234
C3orf16	1	6665	6	226643	0.183649	0.568234
C4orf29	1	6665	6	226643	0.183649	0.568234
C9orf142	1	6665	6	226643	0.183649	0.568234
CD69	1	6665	6	226643	0.183649	0.568234
CDK16	1	6665	6	226643	0.183649	0.568234
CDKN3	1	6665	6	226643	0.183649	0.568234
CELSR3	1	6665	6	226643	0.183649	0.568234
CENPBD1	1	6665	6	226643	0.183649	0.568234
CEP152	1	6665	6	226643	0.183649	0.568234
CMTM8	1	6665	6	226643	0.183649	0.568234
CNOT10	1	6665	6	226643	0.183649	0.568234
COL13A1	1	6665	6	226643	0.183649	0.568234
CSRNP3	1	6665	6	226643	0.183649	0.568234
DCX	1	6665	6	226643	0.183649	0.568234
EIF2AK1	1	6665	6	226643	0.183649	0.568234
FADD	1	6665	6	226643	0.183649	0.568234
FAM113A	1	6665	6	226643	0.183649	0.568234
FAM120B	1	6665	6	226643	0.183649	0.568234
FAM129A	1	6665	6	226643	0.183649	0.568234
FBXO4	1	6665	6	226643	0.183649	0.568234
FBXW8	1	6665	6	226643	0.183649	0.568234
FLJ40852	1	6665	6	226643	0.183649	0.568234
FZD5	1	6665	6	226643	0.183649	0.568234
GABBR1	1	6665	6	226643	0.183649	0.568234
GALE	1	6665	6	226643	0.183649	0.568234
GBE1	1	6665	6	226643	0.183649	0.568234
GLCCI1	1	6665	6	226643	0.183649	0.568234
GLIPR1L2	1	6665	6	226643	0.183649	0.568234
GLT25D1	1	6665	6	226643	0.183649	0.568234
GOT2	1	6665	6	226643	0.183649	0.568234
GRIK5	1	6665	6	226643	0.183649	0.568234
IKBIP	1	6665	6	226643	0.183649	0.568234
IL34	1	6665	6	226643	0.183649	0.568234
IQCB1	1	6665	6	226643	0.183649	0.568234
KAT2A	1	6665	6	226643	0.183649	0.568234
KCNJ14	1	6665	6	226643	0.183649	0.568234
KCNN2	1	6665	6	226643	0.183649	0.568234
KIAA0831	1	6665	6	226643	0.183649	0.568234
KIF26B	1	6665	6	226643	0.183649	0.568234
KLHDC4	1	6665	6	226643	0.183649	0.568234
KLHL6	1	6665	6	226643	0.183649	0.568234
LHX4	1	6665	6	226643	0.183649	0.568234
LPP	1	6665	6	226643	0.183649	0.568234
MAN1A1	1	6665	6	226643	0.183649	0.568234
MFSD10	1	6665	6	226643	0.183649	0.568234
MGAT3	1	6665	6	226643	0.183649	0.568234
MKRN2	1	6665	6	226643	0.183649	0.568234
MMD	1	6665	6	226643	0.183649	0.568234
MTMR8	1	6665	6	226643	0.183649	0.568234
MTMR9L	1	6665	6	226643	0.183649	0.568234
NAAA	1	6665	6	226643	0.183649	0.568234
NDUFA9	1	6665	6	226643	0.183649	0.568234
NRBP2	1	6665	6	226643	0.183649	0.568234
NUCB2	1	6665	6	226643	0.183649	0.568234
ODF3B	1	6665	6	226643	0.183649	0.568234
PBX4	1	6665	6	226643	0.183649	0.568234
PDLIM2	1	6665	6	226643	0.183649	0.568234
PEX12	1	6665	6	226643	0.183649	0.568234
PKP4	1	6665	6	226643	0.183649	0.568234
PLEKHA9	1	6665	6	226643	0.183649	0.568234
PLIN3	1	6665	6	226643	0.183649	0.568234
PPP1R14A	1	6665	6	226643	0.183649	0.568234
PRDM11	1	6665	6	226643	0.183649	0.568234
PRDX2	1	6665	6	226643	0.183649	0.568234
PRKCZ	1	6665	6	226643	0.183649	0.568234
PRR5	1	6665	6	226643	0.183649	0.568234
PRSS36	1	6665	6	226643	0.183649	0.568234
PTPRQ	1	6665	6	226643	0.183649	0.568234
RAB4B	1	6665	6	226643	0.183649	0.568234
RIOK3	1	6665	6	226643	0.183649	0.568234
RLTPR	1	6665	6	226643	0.183649	0.568234
RMND1	1	6665	6	226643	0.183649	0.568234
RPRD1A	1	6665	6	226643	0.183649	0.568234
RUNX3	1	6665	6	226643	0.183649	0.568234
SAC3D1	1	6665	6	226643	0.183649	0.568234
SH2D5	1	6665	6	226643	0.183649	0.568234
SLC23A2	1	6665	6	226643	0.183649	0.568234
SLC35A2	1	6665	6	226643	0.183649	0.568234
SRRT	1	6665	6	226643	0.183649	0.568234
STYXL1	1	6665	6	226643	0.183649	0.568234
TECR	1	6665	6	226643	0.183649	0.568234
TERT	1	6665	6	226643	0.183649	0.568234
TMEM9	1	6665	6	226643	0.183649	0.568234
TRIM5	1	6665	6	226643	0.183649	0.568234
UBXN4	1	6665	6	226643	0.183649	0.568234
UCKL1	1	6665	6	226643	0.183649	0.568234
ZMYM2	1	6665	6	226643	0.183649	0.568234
CAPRIN1	3	6665	49	226643	0.185694	0.571367
LRRC69	3	6665	49	226643	0.185694	0.571367
MOV10L1	3	6665	49	226643	0.185694	0.571367
SPG20	3	6665	49	226643	0.185694	0.571367
TRDMT1	3	6665	49	226643	0.185694	0.571367
ZNF219	3	6665	49	226643	0.185694	0.571367
SLMO1	4	6665	75	226643	0.189834	0.579873
B3GNT1	2	6665	26	226643	0.190133	0.579873
CCDC129	2	6665	26	226643	0.190133	0.579873
NCRNA00158	2	6665	26	226643	0.190133	0.579873
UHRF1BP1	2	6665	26	226643	0.190133	0.579873
MMP24	6	6665	129	226643	0.190496	0.579873
ADAMTS3	3	6665	50	226643	0.192953	0.579873
UGT1A6	3	6665	50	226643	0.192953	0.579873
TGIF1	4	6665	76	226643	0.195655	0.579873
PTPRG	8	6665	187	226643	0.196868	0.579873
LRRC8B	5	6665	103	226643	0.197062	0.579873
AGBL1	6	6665	131	226643	0.199241	0.579873
C6orf168	2	6665	27	226643	0.200582	0.579873
CUEDC2	2	6665	27	226643	0.200582	0.579873
HEXIM2	2	6665	27	226643	0.200582	0.579873
NR1H3	2	6665	27	226643	0.200582	0.579873
TMEM182	2	6665	27	226643	0.200582	0.579873
CDK2AP1	5	6665	104	226643	0.202068	0.579873
ATP8A2	10	6665	248	226643	0.206526	0.579873
AMFR	1	6665	7	226643	0.206973	0.579873
ANKRD26	1	6665	7	226643	0.206973	0.579873
AUH	1	6665	7	226643	0.206973	0.579873
BHLHE22	1	6665	7	226643	0.206973	0.579873
BTN3A2	1	6665	7	226643	0.206973	0.579873
C10orf18	1	6665	7	226643	0.206973	0.579873
C14orf118	1	6665	7	226643	0.206973	0.579873
C14orf28	1	6665	7	226643	0.206973	0.579873
C1orf112	1	6665	7	226643	0.206973	0.579873
C1orf83	1	6665	7	226643	0.206973	0.579873
C1orf91	1	6665	7	226643	0.206973	0.579873
C1orf96	1	6665	7	226643	0.206973	0.579873
C4orf42	1	6665	7	226643	0.206973	0.579873
C4orf43	1	6665	7	226643	0.206973	0.579873
C9orf50	1	6665	7	226643	0.206973	0.579873
CASC4	1	6665	7	226643	0.206973	0.579873
CASP8	1	6665	7	226643	0.206973	0.579873
CD276	1	6665	7	226643	0.206973	0.579873
CES2	1	6665	7	226643	0.206973	0.579873
CN5H6.4	1	6665	7	226643	0.206973	0.579873
COX7A2L	1	6665	7	226643	0.206973	0.579873
DCAF8	1	6665	7	226643	0.206973	0.579873
DENND4C	1	6665	7	226643	0.206973	0.579873
DGKE	1	6665	7	226643	0.206973	0.579873
DOPEY1	1	6665	7	226643	0.206973	0.579873
EHHADH	1	6665	7	226643	0.206973	0.579873
FLJ35024	1	6665	7	226643	0.206973	0.579873
FOXA1	1	6665	7	226643	0.206973	0.579873
GAS2	1	6665	7	226643	0.206973	0.579873
GAS6	1	6665	7	226643	0.206973	0.579873
HNRNPU	1	6665	7	226643	0.206973	0.579873
KCNIP2	1	6665	7	226643	0.206973	0.579873
LRFN2	1	6665	7	226643	0.206973	0.579873
MAML1	1	6665	7	226643	0.206973	0.579873
MAP1LC3B	1	6665	7	226643	0.206973	0.579873
MGAT5	1	6665	7	226643	0.206973	0.579873
MGRN1	1	6665	7	226643	0.206973	0.579873
MLLT1	1	6665	7	226643	0.206973	0.579873
MRPS12	1	6665	7	226643	0.206973	0.579873
MRPS26	1	6665	7	226643	0.206973	0.579873
MTHFSD	1	6665	7	226643	0.206973	0.579873
NCRNA00235	1	6665	7	226643	0.206973	0.579873
NFXL1	1	6665	7	226643	0.206973	0.579873
NOX5	1	6665	7	226643	0.206973	0.579873
NPW	1	6665	7	226643	0.206973	0.579873
NR2F1	1	6665	7	226643	0.206973	0.579873
NRXN2	1	6665	7	226643	0.206973	0.579873
OLFML1	1	6665	7	226643	0.206973	0.579873
PDZD4	1	6665	7	226643	0.206973	0.579873
PERP	1	6665	7	226643	0.206973	0.579873
PET112L	1	6665	7	226643	0.206973	0.579873
PHLDB1	1	6665	7	226643	0.206973	0.579873
PJA2	1	6665	7	226643	0.206973	0.579873
PLCB3	1	6665	7	226643	0.206973	0.579873
PNP	1	6665	7	226643	0.206973	0.579873
PODNL1	1	6665	7	226643	0.206973	0.579873
PPM1F	1	6665	7	226643	0.206973	0.579873
PREX1	1	6665	7	226643	0.206973	0.579873
RAB40C	1	6665	7	226643	0.206973	0.579873
RGP1	1	6665	7	226643	0.206973	0.579873
RGS9BP	1	6665	7	226643	0.206973	0.579873
RNF139	1	6665	7	226643	0.206973	0.579873
SELO	1	6665	7	226643	0.206973	0.579873
SERINC1	1	6665	7	226643	0.206973	0.579873
SGSM2	1	6665	7	226643	0.206973	0.579873
SLC15A1	1	6665	7	226643	0.206973	0.579873
SLC25A21	1	6665	7	226643	0.206973	0.579873
SLC28A1	1	6665	7	226643	0.206973	0.579873
SNX24	1	6665	7	226643	0.206973	0.579873
SPTAN1	1	6665	7	226643	0.206973	0.579873
STARD7	1	6665	7	226643	0.206973	0.579873
STON2	1	6665	7	226643	0.206973	0.579873
TAF6	1	6665	7	226643	0.206973	0.579873
TEAD4	1	6665	7	226643	0.206973	0.579873
TKTL1	1	6665	7	226643	0.206973	0.579873
TM9SF2	1	6665	7	226643	0.206973	0.579873
TPCN2	1	6665	7	226643	0.206973	0.579873
TPT1	1	6665	7	226643	0.206973	0.579873
UCKL1AS	1	6665	7	226643	0.206973	0.579873
USP45	1	6665	7	226643	0.206973	0.579873
VAMP2	1	6665	7	226643	0.206973	0.579873
ZC3HAV1L	1	6665	7	226643	0.206973	0.579873
ZFP36L2	1	6665	7	226643	0.206973	0.579873
ZKSCAN5	1	6665	7	226643	0.206973	0.579873
ZNF317	1	6665	7	226643	0.206973	0.579873
ZP3	1	6665	7	226643	0.206973	0.579873
ZRANB2	1	6665	7	226643	0.206973	0.579873
SH3BP2	3	6665	52	226643	0.207673	0.581345
BAZ2A	2	6665	28	226643	0.211096	0.587459
DTNB	2	6665	28	226643	0.211096	0.587459
PGBD3	2	6665	28	226643	0.211096	0.587459
PTPRN2	2	6665	28	226643	0.211096	0.587459
TFDP2	2	6665	28	226643	0.211096	0.587459
USP18	2	6665	28	226643	0.211096	0.587459
ZFHX4	2	6665	28	226643	0.211096	0.587459
MNT	4	6665	79	226643	0.213432	0.588704
CENPV	3	6665	53	226643	0.215125	0.588704
SMARCA4	3	6665	53	226643	0.215125	0.588704
MEIS1	5	6665	107	226643	0.217332	0.588704
EPHA3	7	6665	164	226643	0.219036	0.588704
PARD3B	4	6665	80	226643	0.219455	0.588704
DAPK2	2	6665	29	226643	0.221661	0.588704
EFCAB2	2	6665	29	226643	0.221661	0.588704
GAB1	2	6665	29	226643	0.221661	0.588704
IQCG	2	6665	29	226643	0.221661	0.588704
LRRC34	2	6665	29	226643	0.221661	0.588704
LTBP4	2	6665	29	226643	0.221661	0.588704
MBD5	2	6665	29	226643	0.221661	0.588704
MLH1	2	6665	29	226643	0.221661	0.588704
NCOR1	2	6665	29	226643	0.221661	0.588704
NR1D1	2	6665	29	226643	0.221661	0.588704
PEX5L	2	6665	29	226643	0.221661	0.588704
RABEP1	2	6665	29	226643	0.221661	0.588704
SHC1	2	6665	29	226643	0.221661	0.588704
SPOP	2	6665	29	226643	0.221661	0.588704
AR	3	6665	54	226643	0.222632	0.588704
DKFZP686I15217	3	6665	54	226643	0.222632	0.588704
ACE	1	6665	8	226643	0.22963	0.588704
ACPL2	1	6665	8	226643	0.22963	0.588704
ADCK1	1	6665	8	226643	0.22963	0.588704
AHDC1	1	6665	8	226643	0.22963	0.588704
ATAD3B	1	6665	8	226643	0.22963	0.588704
ATP8B2	1	6665	8	226643	0.22963	0.588704
BRSK1	1	6665	8	226643	0.22963	0.588704
C19orf60	1	6665	8	226643	0.22963	0.588704
C21orf67	1	6665	8	226643	0.22963	0.588704
C9orf93	1	6665	8	226643	0.22963	0.588704
C9orf95	1	6665	8	226643	0.22963	0.588704
CAND2	1	6665	8	226643	0.22963	0.588704
CAP2	1	6665	8	226643	0.22963	0.588704
CASC3	1	6665	8	226643	0.22963	0.588704
CCDC109B	1	6665	8	226643	0.22963	0.588704
CLDND2	1	6665	8	226643	0.22963	0.588704
CSPP1	1	6665	8	226643	0.22963	0.588704
CXorf26	1	6665	8	226643	0.22963	0.588704
CYB5B	1	6665	8	226643	0.22963	0.588704
DDR1	1	6665	8	226643	0.22963	0.588704
EFHC1	1	6665	8	226643	0.22963	0.588704
EFNA3	1	6665	8	226643	0.22963	0.588704
EPB41L1	1	6665	8	226643	0.22963	0.588704
EPN3	1	6665	8	226643	0.22963	0.588704
ESRRA	1	6665	8	226643	0.22963	0.588704
FAM119B	1	6665	8	226643	0.22963	0.588704
GPR107	1	6665	8	226643	0.22963	0.588704
GRLF1	1	6665	8	226643	0.22963	0.588704
HIGD1A	1	6665	8	226643	0.22963	0.588704
IL6ST	1	6665	8	226643	0.22963	0.588704
ITGB1BP1	1	6665	8	226643	0.22963	0.588704
KCNH1	1	6665	8	226643	0.22963	0.588704
KHDRBS1	1	6665	8	226643	0.22963	0.588704
KIAA1949	1	6665	8	226643	0.22963	0.588704
KIAA2026	1	6665	8	226643	0.22963	0.588704
LGR6	1	6665	8	226643	0.22963	0.588704
LOC100134368	1	6665	8	226643	0.22963	0.588704
LRRC20	1	6665	8	226643	0.22963	0.588704
MGAT2	1	6665	8	226643	0.22963	0.588704
MLXIP	1	6665	8	226643	0.22963	0.588704
MSH2	1	6665	8	226643	0.22963	0.588704
NBEAL2	1	6665	8	226643	0.22963	0.588704
NBR2	1	6665	8	226643	0.22963	0.588704
NCAPH2	1	6665	8	226643	0.22963	0.588704
NDUFB9	1	6665	8	226643	0.22963	0.588704
NUAK1	1	6665	8	226643	0.22963	0.588704
NUDT9	1	6665	8	226643	0.22963	0.588704
NUP98	1	6665	8	226643	0.22963	0.588704
PAN3	1	6665	8	226643	0.22963	0.588704
PEX2	1	6665	8	226643	0.22963	0.588704
PLEKHA4	1	6665	8	226643	0.22963	0.588704
PSAP	1	6665	8	226643	0.22963	0.588704
PTPRS	1	6665	8	226643	0.22963	0.588704
RAB30	1	6665	8	226643	0.22963	0.588704
RBKS	1	6665	8	226643	0.22963	0.588704
RFC4	1	6665	8	226643	0.22963	0.588704
RNF138	1	6665	8	226643	0.22963	0.588704
RNF213	1	6665	8	226643	0.22963	0.588704
ROCK2	1	6665	8	226643	0.22963	0.588704
SMARCC2	1	6665	8	226643	0.22963	0.588704
SPAST	1	6665	8	226643	0.22963	0.588704
SS18	1	6665	8	226643	0.22963	0.588704
ST20	1	6665	8	226643	0.22963	0.588704
STK32B	1	6665	8	226643	0.22963	0.588704
STT3A	1	6665	8	226643	0.22963	0.588704
TEAD2	1	6665	8	226643	0.22963	0.588704
THAP11	1	6665	8	226643	0.22963	0.588704
TIGD1	1	6665	8	226643	0.22963	0.588704
TMEM132C	1	6665	8	226643	0.22963	0.588704
TMEM186	1	6665	8	226643	0.22963	0.588704
TPD52L2	1	6665	8	226643	0.22963	0.588704
USP42	1	6665	8	226643	0.22963	0.588704
UTP14A	1	6665	8	226643	0.22963	0.588704
VAV1	1	6665	8	226643	0.22963	0.588704
WASF2	1	6665	8	226643	0.22963	0.588704
ZADH2	1	6665	8	226643	0.22963	0.588704
ZFP64	1	6665	8	226643	0.22963	0.588704
ZNF182	1	6665	8	226643	0.22963	0.588704
ZNF207	1	6665	8	226643	0.22963	0.588704
ZNF76	1	6665	8	226643	0.22963	0.588704
EXOC6B	4	6665	82	226643	0.231631	0.591353
MORF4L1	4	6665	82	226643	0.231631	0.591353
C17orf63	2	6665	30	226643	0.232267	0.591353
C5orf33	2	6665	30	226643	0.232267	0.591353
ITPA	2	6665	30	226643	0.232267	0.591353
MAP7D2	2	6665	30	226643	0.232267	0.591353
PARP1	2	6665	30	226643	0.232267	0.591353
RNF182	2	6665	30	226643	0.232267	0.591353
ZRANB3	2	6665	30	226643	0.232267	0.591353
PARN	5	6665	110	226643	0.232937	0.592606
GPC6	8	6665	198	226643	0.23831	0.595755
MIR548M	6	6665	140	226643	0.240274	0.595755
CDC14A	2	6665	31	226643	0.242901	0.595755
IGF2BP2	2	6665	31	226643	0.242901	0.595755
KEAP1	2	6665	31	226643	0.242901	0.595755
LYST	2	6665	31	226643	0.242901	0.595755
MYH10	2	6665	31	226643	0.242901	0.595755
PEX14	2	6665	31	226643	0.242901	0.595755
PGCP	2	6665	31	226643	0.242901	0.595755
RECK	2	6665	31	226643	0.242901	0.595755
SLC35B4	2	6665	31	226643	0.242901	0.595755
CDON	4	6665	84	226643	0.243968	0.595755
ST3GAL3	6	6665	142	226643	0.249719	0.595755
ABCA12	1	6665	9	226643	0.25164	0.595755
AXL	1	6665	9	226643	0.25164	0.595755
BTG2	1	6665	9	226643	0.25164	0.595755
C3orf58	1	6665	9	226643	0.25164	0.595755
C6orf176	1	6665	9	226643	0.25164	0.595755
CCDC38	1	6665	9	226643	0.25164	0.595755
CNOT8	1	6665	9	226643	0.25164	0.595755
COL9A3	1	6665	9	226643	0.25164	0.595755
COX8A	1	6665	9	226643	0.25164	0.595755
DCUN1D1	1	6665	9	226643	0.25164	0.595755
DFFA	1	6665	9	226643	0.25164	0.595755
DHRS3	1	6665	9	226643	0.25164	0.595755
DNAJC14	1	6665	9	226643	0.25164	0.595755
DPP9	1	6665	9	226643	0.25164	0.595755
DSP	1	6665	9	226643	0.25164	0.595755
DUT	1	6665	9	226643	0.25164	0.595755
ERAP1	1	6665	9	226643	0.25164	0.595755
FAM102A	1	6665	9	226643	0.25164	0.595755
FAM105B	1	6665	9	226643	0.25164	0.595755
FAM114A1	1	6665	9	226643	0.25164	0.595755
FAM115A	1	6665	9	226643	0.25164	0.595755
FAM19A1	1	6665	9	226643	0.25164	0.595755
FKBP14	1	6665	9	226643	0.25164	0.595755
FZR1	1	6665	9	226643	0.25164	0.595755
GALNT11	1	6665	9	226643	0.25164	0.595755
GBAS	1	6665	9	226643	0.25164	0.595755
GBGT1	1	6665	9	226643	0.25164	0.595755
GCC2	1	6665	9	226643	0.25164	0.595755
GGA3	1	6665	9	226643	0.25164	0.595755
GLRA3	1	6665	9	226643	0.25164	0.595755
GPATCH2	1	6665	9	226643	0.25164	0.595755
GRM5	1	6665	9	226643	0.25164	0.595755
HEMK1	1	6665	9	226643	0.25164	0.595755
INTS6	1	6665	9	226643	0.25164	0.595755
KLHL9	1	6665	9	226643	0.25164	0.595755
LMAN1	1	6665	9	226643	0.25164	0.595755
LOC100128191	1	6665	9	226643	0.25164	0.595755
LOC113230	1	6665	9	226643	0.25164	0.595755
LRRFIP1	1	6665	9	226643	0.25164	0.595755
LRRN3	1	6665	9	226643	0.25164	0.595755
MAMSTR	1	6665	9	226643	0.25164	0.595755
MCOLN2	1	6665	9	226643	0.25164	0.595755
METTL11A	1	6665	9	226643	0.25164	0.595755
MIF4GD	1	6665	9	226643	0.25164	0.595755
MYST3	1	6665	9	226643	0.25164	0.595755
NCOA5	1	6665	9	226643	0.25164	0.595755
NFE2L2	1	6665	9	226643	0.25164	0.595755
NFKBID	1	6665	9	226643	0.25164	0.595755
NR2C2	1	6665	9	226643	0.25164	0.595755
PDCD2L	1	6665	9	226643	0.25164	0.595755
PHF6	1	6665	9	226643	0.25164	0.595755
PHRF1	1	6665	9	226643	0.25164	0.595755
PLAC8	1	6665	9	226643	0.25164	0.595755
PXMP4	1	6665	9	226643	0.25164	0.595755
PYGO1	1	6665	9	226643	0.25164	0.595755
QKI	1	6665	9	226643	0.25164	0.595755
RHOT1	1	6665	9	226643	0.25164	0.595755
RWDD3	1	6665	9	226643	0.25164	0.595755
SENP6	1	6665	9	226643	0.25164	0.595755
SKI	1	6665	9	226643	0.25164	0.595755
SLC44A4	1	6665	9	226643	0.25164	0.595755
SPAG1	1	6665	9	226643	0.25164	0.595755
STIM1	1	6665	9	226643	0.25164	0.595755
TAF4B	1	6665	9	226643	0.25164	0.595755
TCEANC	1	6665	9	226643	0.25164	0.595755
TOP3B	1	6665	9	226643	0.25164	0.595755
TRIP13	1	6665	9	226643	0.25164	0.595755
TSTD2	1	6665	9	226643	0.25164	0.595755
UBE2CBP	1	6665	9	226643	0.25164	0.595755
VDAC2	1	6665	9	226643	0.25164	0.595755
VGF	1	6665	9	226643	0.25164	0.595755
VLDLR	1	6665	9	226643	0.25164	0.595755
WAC	1	6665	9	226643	0.25164	0.595755
WIPF2	1	6665	9	226643	0.25164	0.595755
XIRP2	1	6665	9	226643	0.25164	0.595755
XPC	1	6665	9	226643	0.25164	0.595755
ZMYND19	1	6665	9	226643	0.25164	0.595755
ZNF333	1	6665	9	226643	0.25164	0.595755
ZNF365	1	6665	9	226643	0.25164	0.595755
ZNF512B	1	6665	9	226643	0.25164	0.595755
ZNF576	1	6665	9	226643	0.25164	0.595755
ZNF616	1	6665	9	226643	0.25164	0.595755
ELFN1	3	6665	58	226643	0.253123	0.595755
AGAP1	2	6665	32	226643	0.253555	0.595755
AGPAT3	2	6665	32	226643	0.253555	0.595755
C9orf43	2	6665	32	226643	0.253555	0.595755
CDC42SE2	2	6665	32	226643	0.253555	0.595755
DPPA4	2	6665	32	226643	0.253555	0.595755
HERPUD2	2	6665	32	226643	0.253555	0.595755
LIMA1	2	6665	32	226643	0.253555	0.595755
MBNL2	2	6665	32	226643	0.253555	0.595755
MORF4L2	2	6665	32	226643	0.253555	0.595755
MYT1	2	6665	32	226643	0.253555	0.595755
RUNX1T1	2	6665	32	226643	0.253555	0.595755
TSHZ3	2	6665	32	226643	0.253555	0.595755
DACH2	8	6665	202	226643	0.254068	0.596447
SOBP	5	6665	114	226643	0.254209	0.596447
FERMT1	4	6665	86	226643	0.256445	0.599094
MAP7	4	6665	86	226643	0.256445	0.599094
PPP2R4	4	6665	86	226643	0.256445	0.599094
DMXL1	3	6665	59	226643	0.26084	0.599094
GTDC1	3	6665	59	226643	0.26084	0.599094
HCK	2	6665	33	226643	0.264218	0.599094
NCAM2	2	6665	33	226643	0.264218	0.599094
PHLPP1	2	6665	33	226643	0.264218	0.599094
RSU1	2	6665	33	226643	0.264218	0.599094
SEMA3A	2	6665	33	226643	0.264218	0.599094
TTLL5	2	6665	33	226643	0.264218	0.599094
ZNF366	2	6665	33	226643	0.264218	0.599094
LGR4	5	6665	116	226643	0.265018	0.599094
HNRNPF	3	6665	60	226643	0.268587	0.599094
NET1	3	6665	60	226643	0.268587	0.599094
ITFG1	4	6665	88	226643	0.269046	0.599094
PCDH11X	5	6665	117	226643	0.270461	0.599094
ALG5	1	6665	10	226643	0.273021	0.599094
ARAP1	1	6665	10	226643	0.273021	0.599094
ARHGAP26	1	6665	10	226643	0.273021	0.599094
ARHGEF18	1	6665	10	226643	0.273021	0.599094
ATRNL1	1	6665	10	226643	0.273021	0.599094
BMP2	1	6665	10	226643	0.273021	0.599094
C18orf1	1	6665	10	226643	0.273021	0.599094
C19orf42	1	6665	10	226643	0.273021	0.599094
C1orf190	1	6665	10	226643	0.273021	0.599094
C21orf49	1	6665	10	226643	0.273021	0.599094
CAPN7	1	6665	10	226643	0.273021	0.599094
CCDC6	1	6665	10	226643	0.273021	0.599094
CDA	1	6665	10	226643	0.273021	0.599094
CDC14B	1	6665	10	226643	0.273021	0.599094
CECR5	1	6665	10	226643	0.273021	0.599094
CHCHD1	1	6665	10	226643	0.273021	0.599094
CHST14	1	6665	10	226643	0.273021	0.599094
CISD2	1	6665	10	226643	0.273021	0.599094
CLUAP1	1	6665	10	226643	0.273021	0.599094
CMC1	1	6665	10	226643	0.273021	0.599094
COQ3	1	6665	10	226643	0.273021	0.599094
COX17	1	6665	10	226643	0.273021	0.599094
CP	1	6665	10	226643	0.273021	0.599094
CTNNBIP1	1	6665	10	226643	0.273021	0.599094
DCUN1D4	1	6665	10	226643	0.273021	0.599094
DCUN1D5	1	6665	10	226643	0.273021	0.599094
DLEU1	1	6665	10	226643	0.273021	0.599094
DOM3Z	1	6665	10	226643	0.273021	0.599094
DPYS	1	6665	10	226643	0.273021	0.599094
DTL	1	6665	10	226643	0.273021	0.599094
DYSFIP1	1	6665	10	226643	0.273021	0.599094
ENO2	1	6665	10	226643	0.273021	0.599094
ERCC5	1	6665	10	226643	0.273021	0.599094
FAM73A	1	6665	10	226643	0.273021	0.599094
FAM83H	1	6665	10	226643	0.273021	0.599094
FUT11	1	6665	10	226643	0.273021	0.599094
GTF2A1	1	6665	10	226643	0.273021	0.599094
HRASLS5	1	6665	10	226643	0.273021	0.599094
IQCC	1	6665	10	226643	0.273021	0.599094
IRS1	1	6665	10	226643	0.273021	0.599094
JPH1	1	6665	10	226643	0.273021	0.599094
KCNJ4	1	6665	10	226643	0.273021	0.599094
KCTD3	1	6665	10	226643	0.273021	0.599094
KDM5C	1	6665	10	226643	0.273021	0.599094
KLHL29	1	6665	10	226643	0.273021	0.599094
LMLN	1	6665	10	226643	0.273021	0.599094
LYPD6B	1	6665	10	226643	0.273021	0.599094
MDK	1	6665	10	226643	0.273021	0.599094
MESP1	1	6665	10	226643	0.273021	0.599094
MPP5	1	6665	10	226643	0.273021	0.599094
MPPE1	1	6665	10	226643	0.273021	0.599094
NAPB	1	6665	10	226643	0.273021	0.599094
NUDT19	1	6665	10	226643	0.273021	0.599094
OAZ2	1	6665	10	226643	0.273021	0.599094
PDE4D	1	6665	10	226643	0.273021	0.599094
PEG10	1	6665	10	226643	0.273021	0.599094
PI4K2B	1	6665	10	226643	0.273021	0.599094
PIK3R4	1	6665	10	226643	0.273021	0.599094
POMT1	1	6665	10	226643	0.273021	0.599094
PSMG3	1	6665	10	226643	0.273021	0.599094
PTPN11	1	6665	10	226643	0.273021	0.599094
PTPN13	1	6665	10	226643	0.273021	0.599094
RAB8A	1	6665	10	226643	0.273021	0.599094
SH2B1	1	6665	10	226643	0.273021	0.599094
SLC38A6	1	6665	10	226643	0.273021	0.599094
SLC47A1	1	6665	10	226643	0.273021	0.599094
SMAD7	1	6665	10	226643	0.273021	0.599094
SNX6	1	6665	10	226643	0.273021	0.599094
STIP1	1	6665	10	226643	0.273021	0.599094
SUMO2	1	6665	10	226643	0.273021	0.599094
SYNJ1	1	6665	10	226643	0.273021	0.599094
TIAM1	1	6665	10	226643	0.273021	0.599094
TMED5	1	6665	10	226643	0.273021	0.599094
TOR1A	1	6665	10	226643	0.273021	0.599094
UBE2O	1	6665	10	226643	0.273021	0.599094
UCK1	1	6665	10	226643	0.273021	0.599094
USP16	1	6665	10	226643	0.273021	0.599094
USP31	1	6665	10	226643	0.273021	0.599094
YTHDC2	1	6665	10	226643	0.273021	0.599094
ZNF142	1	6665	10	226643	0.273021	0.599094
ZNF70	1	6665	10	226643	0.273021	0.599094
C6orf170	2	6665	34	226643	0.274881	0.600792
DDX28	2	6665	34	226643	0.274881	0.600792
GRIK4	2	6665	34	226643	0.274881	0.600792
HOMER2	2	6665	34	226643	0.274881	0.600792
PRKAR1B	2	6665	34	226643	0.274881	0.600792
RAB28	2	6665	34	226643	0.274881	0.600792
PPP3CC	4	6665	89	226643	0.275387	0.601502
C18orf34	3	6665	61	226643	0.276358	0.602831
RBL1	3	6665	61	226643	0.276358	0.602831
BCAT1	5	6665	119	226643	0.281416	0.61036
EPHA6	5	6665	119	226643	0.281416	0.61036
RPL4	4	6665	90	226643	0.281752	0.61036
SDCCAG8	4	6665	90	226643	0.281752	0.61036
PHF16	3	6665	62	226643	0.284151	0.61036
UGT1A7	3	6665	62	226643	0.284151	0.61036
CANX	2	6665	35	226643	0.285535	0.61036
NYX	2	6665	35	226643	0.285535	0.61036
RAB12	2	6665	35	226643	0.285535	0.61036
STAT3	2	6665	35	226643	0.285535	0.61036
WDR66	2	6665	35	226643	0.285535	0.61036
MAD2L2	4	6665	91	226643	0.288139	0.61036
EFHC2	3	6665	63	226643	0.291962	0.61036
UGT1A10	3	6665	63	226643	0.291962	0.61036
UGT1A8	3	6665	63	226643	0.291962	0.61036
UGT1A9	3	6665	63	226643	0.291962	0.61036
VAV2	3	6665	63	226643	0.291962	0.61036
FRMD6	6	6665	151	226643	0.293372	0.61036
ACD	1	6665	11	226643	0.293791	0.61036
ALS2	1	6665	11	226643	0.293791	0.61036
ANKRD39	1	6665	11	226643	0.293791	0.61036
ARHGAP19	1	6665	11	226643	0.293791	0.61036
BCR	1	6665	11	226643	0.293791	0.61036
C10orf11	1	6665	11	226643	0.293791	0.61036
C1orf86	1	6665	11	226643	0.293791	0.61036
C5orf42	1	6665	11	226643	0.293791	0.61036
C9orf100	1	6665	11	226643	0.293791	0.61036
CASP2	1	6665	11	226643	0.293791	0.61036
CUL5	1	6665	11	226643	0.293791	0.61036
DDX50	1	6665	11	226643	0.293791	0.61036
DGKA	1	6665	11	226643	0.293791	0.61036
EEF1A2	1	6665	11	226643	0.293791	0.61036
EEF1B2	1	6665	11	226643	0.293791	0.61036
EN2	1	6665	11	226643	0.293791	0.61036
FAM64A	1	6665	11	226643	0.293791	0.61036
FBXL20	1	6665	11	226643	0.293791	0.61036
FKBP8	1	6665	11	226643	0.293791	0.61036
FTSJ3	1	6665	11	226643	0.293791	0.61036
GLYCTK	1	6665	11	226643	0.293791	0.61036
GRM1	1	6665	11	226643	0.293791	0.61036
GTF3C4	1	6665	11	226643	0.293791	0.61036
IFT46	1	6665	11	226643	0.293791	0.61036
ITGA9	1	6665	11	226643	0.293791	0.61036
KBTBD11	1	6665	11	226643	0.293791	0.61036
KIF1A	1	6665	11	226643	0.293791	0.61036
LMNB2	1	6665	11	226643	0.293791	0.61036
MATK	1	6665	11	226643	0.293791	0.61036
MPRIP	1	6665	11	226643	0.293791	0.61036
MTHFD2L	1	6665	11	226643	0.293791	0.61036
NCRNA00116	1	6665	11	226643	0.293791	0.61036
PARP3	1	6665	11	226643	0.293791	0.61036
PCDH19	1	6665	11	226643	0.293791	0.61036
PHF15	1	6665	11	226643	0.293791	0.61036
PHF17	1	6665	11	226643	0.293791	0.61036
POLH	1	6665	11	226643	0.293791	0.61036
POLQ	1	6665	11	226643	0.293791	0.61036
PTER	1	6665	11	226643	0.293791	0.61036
PTP4A1	1	6665	11	226643	0.293791	0.61036
PURG	1	6665	11	226643	0.293791	0.61036
RBMXL1	1	6665	11	226643	0.293791	0.61036
SCOC	1	6665	11	226643	0.293791	0.61036
SULF2	1	6665	11	226643	0.293791	0.61036
TCEA1	1	6665	11	226643	0.293791	0.61036
TMED8	1	6665	11	226643	0.293791	0.61036
TMEM102	1	6665	11	226643	0.293791	0.61036
TNFSF11	1	6665	11	226643	0.293791	0.61036
TNRC6A	1	6665	11	226643	0.293791	0.61036
TRAT1	1	6665	11	226643	0.293791	0.61036
TTBK2	1	6665	11	226643	0.293791	0.61036
TTC9C	1	6665	11	226643	0.293791	0.61036
TTLL11	1	6665	11	226643	0.293791	0.61036
TXLNA	1	6665	11	226643	0.293791	0.61036
UBIAD1	1	6665	11	226643	0.293791	0.61036
WDR78	1	6665	11	226643	0.293791	0.61036
ZNF691	1	6665	11	226643	0.293791	0.61036
ARHGAP21	2	6665	36	226643	0.296172	0.61036
ATRX	2	6665	36	226643	0.296172	0.61036
B4GALT5	2	6665	36	226643	0.296172	0.61036
BAG2	2	6665	36	226643	0.296172	0.61036
CCDC109A	2	6665	36	226643	0.296172	0.61036
FAM13C	2	6665	36	226643	0.296172	0.61036
KCNH8	2	6665	36	226643	0.296172	0.61036
METTL7A	2	6665	36	226643	0.296172	0.61036
NME7	2	6665	36	226643	0.296172	0.61036
PUM1	2	6665	36	226643	0.296172	0.61036
RNF44	2	6665	36	226643	0.296172	0.61036
SLC1A5	2	6665	36	226643	0.296172	0.61036
TMEM107	2	6665	36	226643	0.296172	0.61036
UNC13B	2	6665	36	226643	0.296172	0.61036
ATXN1	3	6665	64	226643	0.299787	0.615695
C9orf85	3	6665	64	226643	0.299787	0.615695
CHMP4B	3	6665	64	226643	0.299787	0.615695
GALNT2	3	6665	64	226643	0.299787	0.615695
SCML2	3	6665	64	226643	0.299787	0.615695
ROD1	4	6665	93	226643	0.30097	0.615695
C4orf22	2	6665	37	226643	0.306784	0.615695
CPA2	2	6665	37	226643	0.306784	0.615695
MYO1D	2	6665	37	226643	0.306784	0.615695
SEL1L3	2	6665	37	226643	0.306784	0.615695
SIAH1	2	6665	37	226643	0.306784	0.615695
SGCZ	4	6665	94	226643	0.30741	0.615695
PTPN9	3	6665	65	226643	0.307622	0.615695
CD36	5	6665	124	226643	0.309146	0.615695
ABCA10	1	6665	12	226643	0.313967	0.615695
ABL2	1	6665	12	226643	0.313967	0.615695
ACVR1B	1	6665	12	226643	0.313967	0.615695
ADD1	1	6665	12	226643	0.313967	0.615695
ARID4A	1	6665	12	226643	0.313967	0.615695
ASFMR1	1	6665	12	226643	0.313967	0.615695
ATP2B2	1	6665	12	226643	0.313967	0.615695
C15orf23	1	6665	12	226643	0.313967	0.615695
C1QTNF1	1	6665	12	226643	0.313967	0.615695
C2orf42	1	6665	12	226643	0.313967	0.615695
C3orf1	1	6665	12	226643	0.313967	0.615695
C3orf63	1	6665	12	226643	0.313967	0.615695
C9orf69	1	6665	12	226643	0.313967	0.615695
CAPZA2	1	6665	12	226643	0.313967	0.615695
CCBL2	1	6665	12	226643	0.313967	0.615695
CCNT2	1	6665	12	226643	0.313967	0.615695
CIZ1	1	6665	12	226643	0.313967	0.615695
CLCN7	1	6665	12	226643	0.313967	0.615695
CLIC1	1	6665	12	226643	0.313967	0.615695
CNIH4	1	6665	12	226643	0.313967	0.615695
CPT2	1	6665	12	226643	0.313967	0.615695
CSDE1	1	6665	12	226643	0.313967	0.615695
DDR2	1	6665	12	226643	0.313967	0.615695
EML3	1	6665	12	226643	0.313967	0.615695
EML4	1	6665	12	226643	0.313967	0.615695
EXT1	1	6665	12	226643	0.313967	0.615695
FAM184A	1	6665	12	226643	0.313967	0.615695
GABRG3	1	6665	12	226643	0.313967	0.615695
GOSR1	1	6665	12	226643	0.313967	0.615695
GREM2	1	6665	12	226643	0.313967	0.615695
GSTA4	1	6665	12	226643	0.313967	0.615695
HACE1	1	6665	12	226643	0.313967	0.615695
HNMT	1	6665	12	226643	0.313967	0.615695
INPP5B	1	6665	12	226643	0.313967	0.615695
LOC100130581	1	6665	12	226643	0.313967	0.615695
LOC641518	1	6665	12	226643	0.313967	0.615695
LRDD	1	6665	12	226643	0.313967	0.615695
LRIT3	1	6665	12	226643	0.313967	0.615695
LRRC23	1	6665	12	226643	0.313967	0.615695
MCM4	1	6665	12	226643	0.313967	0.615695
MFSD11	1	6665	12	226643	0.313967	0.615695
MLKL	1	6665	12	226643	0.313967	0.615695
MPP7	1	6665	12	226643	0.313967	0.615695
NACC2	1	6665	12	226643	0.313967	0.615695
NICN1	1	6665	12	226643	0.313967	0.615695
NR2C2AP	1	6665	12	226643	0.313967	0.615695
PDHX	1	6665	12	226643	0.313967	0.615695
PEX1	1	6665	12	226643	0.313967	0.615695
PPP1R12A	1	6665	12	226643	0.313967	0.615695
PPP1R8	1	6665	12	226643	0.313967	0.615695
PTAR1	1	6665	12	226643	0.313967	0.615695
RAB26	1	6665	12	226643	0.313967	0.615695
RAD52	1	6665	12	226643	0.313967	0.615695
RANBP9	1	6665	12	226643	0.313967	0.615695
RAVER1	1	6665	12	226643	0.313967	0.615695
SEC24C	1	6665	12	226643	0.313967	0.615695
SRRM2	1	6665	12	226643	0.313967	0.615695
TBC1D4	1	6665	12	226643	0.313967	0.615695
TCEA3	1	6665	12	226643	0.313967	0.615695
THAP7	1	6665	12	226643	0.313967	0.615695
TMC2	1	6665	12	226643	0.313967	0.615695
TRAK1	1	6665	12	226643	0.313967	0.615695
USP1	1	6665	12	226643	0.313967	0.615695
ZBTB1	1	6665	12	226643	0.313967	0.615695
ZFYVE16	1	6665	12	226643	0.313967	0.615695
ZNF195	1	6665	12	226643	0.313967	0.615695
ZNF282	1	6665	12	226643	0.313967	0.615695
ZNF581	1	6665	12	226643	0.313967	0.615695
SOX6	7	6665	186	226643	0.31512	0.617591
RASSF3	3	6665	66	226643	0.315463	0.617898
ABCC1	2	6665	38	226643	0.317365	0.618702
ASS1	2	6665	38	226643	0.317365	0.618702
CHN2	2	6665	38	226643	0.317365	0.618702
LRTOMT	2	6665	38	226643	0.317365	0.618702
MSH3	2	6665	38	226643	0.317365	0.618702
PARVB	2	6665	38	226643	0.317365	0.618702
TBC1D22A	2	6665	38	226643	0.317365	0.618702
USP25	2	6665	38	226643	0.317365	0.618702
ZEB2	4	6665	96	226643	0.320328	0.622859
C11orf30	3	6665	67	226643	0.323308	0.622859
PLCB4	3	6665	67	226643	0.323308	0.622859
AGTR1	2	6665	39	226643	0.327906	0.622859
C5orf36	2	6665	39	226643	0.327906	0.622859
CDH6	2	6665	39	226643	0.327906	0.622859
COL4A5	2	6665	39	226643	0.327906	0.622859
FBXW4	2	6665	39	226643	0.327906	0.622859
LETMD1	2	6665	39	226643	0.327906	0.622859
MAPT	2	6665	39	226643	0.327906	0.622859
PLD6	2	6665	39	226643	0.327906	0.622859
TAL1	2	6665	39	226643	0.327906	0.622859
TBL1X	2	6665	39	226643	0.327906	0.622859
MARCH1	7	6665	189	226643	0.328838	0.622859
FRYL	3	6665	68	226643	0.331153	0.622859
AAGAB	1	6665	13	226643	0.333567	0.622859
ABI3BP	1	6665	13	226643	0.333567	0.622859
ANKHD1	1	6665	13	226643	0.333567	0.622859
ANKHD1-EIF4EBP3	1	6665	13	226643	0.333567	0.622859
ANKS1B	1	6665	13	226643	0.333567	0.622859
ARHGAP5	1	6665	13	226643	0.333567	0.622859
ARMC3	1	6665	13	226643	0.333567	0.622859
C10orf25	1	6665	13	226643	0.333567	0.622859
C12orf73	1	6665	13	226643	0.333567	0.622859
C17orf59	1	6665	13	226643	0.333567	0.622859
C22orf34	1	6665	13	226643	0.333567	0.622859
CDR2	1	6665	13	226643	0.333567	0.622859
CERKL	1	6665	13	226643	0.333567	0.622859
CRKL	1	6665	13	226643	0.333567	0.622859
CUL9	1	6665	13	226643	0.333567	0.622859
CXorf57	1	6665	13	226643	0.333567	0.622859
DAZAP2	1	6665	13	226643	0.333567	0.622859
DOCK8	1	6665	13	226643	0.333567	0.622859
DSC2	1	6665	13	226643	0.333567	0.622859
EDARADD	1	6665	13	226643	0.333567	0.622859
GPR124	1	6665	13	226643	0.333567	0.622859
HMCN1	1	6665	13	226643	0.333567	0.622859
HSD17B14	1	6665	13	226643	0.333567	0.622859
JUNB	1	6665	13	226643	0.333567	0.622859
LDHA	1	6665	13	226643	0.333567	0.622859
LOC100128977	1	6665	13	226643	0.333567	0.622859
LRCH1	1	6665	13	226643	0.333567	0.622859
LRRC17	1	6665	13	226643	0.333567	0.622859
MAN1B1	1	6665	13	226643	0.333567	0.622859
MAP3K15	1	6665	13	226643	0.333567	0.622859
MTR	1	6665	13	226643	0.333567	0.622859
MTRF1	1	6665	13	226643	0.333567	0.622859
NCRNA00095	1	6665	13	226643	0.333567	0.622859
NDFIP1	1	6665	13	226643	0.333567	0.622859
NHLRC3	1	6665	13	226643	0.333567	0.622859
NIPAL2	1	6665	13	226643	0.333567	0.622859
NUCKS1	1	6665	13	226643	0.333567	0.622859
PHIP	1	6665	13	226643	0.333567	0.622859
PKIG	1	6665	13	226643	0.333567	0.622859
PM20D2	1	6665	13	226643	0.333567	0.622859
PML	1	6665	13	226643	0.333567	0.622859
POT1	1	6665	13	226643	0.333567	0.622859
PPP2R5E	1	6665	13	226643	0.333567	0.622859
PRR12	1	6665	13	226643	0.333567	0.622859
PTCD2	1	6665	13	226643	0.333567	0.622859
RCBTB2	1	6665	13	226643	0.333567	0.622859
RNF145	1	6665	13	226643	0.333567	0.622859
RNF165	1	6665	13	226643	0.333567	0.622859
RNF216	1	6665	13	226643	0.333567	0.622859
SCO1	1	6665	13	226643	0.333567	0.622859
SIK2	1	6665	13	226643	0.333567	0.622859
SLC35D2	1	6665	13	226643	0.333567	0.622859
SPPL2A	1	6665	13	226643	0.333567	0.622859
SQLE	1	6665	13	226643	0.333567	0.622859
TCF19	1	6665	13	226643	0.333567	0.622859
TMEM199	1	6665	13	226643	0.333567	0.622859
USP15	1	6665	13	226643	0.333567	0.622859
XRRA1	1	6665	13	226643	0.333567	0.622859
ZBED4	1	6665	13	226643	0.333567	0.622859
ZNF322A	1	6665	13	226643	0.333567	0.622859
BANP	2	6665	40	226643	0.338403	0.62941
CLSTN2	2	6665	40	226643	0.338403	0.62941
MTHFS	2	6665	40	226643	0.338403	0.62941
PIBF1	2	6665	40	226643	0.338403	0.62941
SESN1	2	6665	40	226643	0.338403	0.62941
SPATA5	2	6665	40	226643	0.338403	0.62941
ZBTB38	2	6665	40	226643	0.338403	0.62941
FGFR2	3	6665	69	226643	0.338995	0.630158
MIR548N	4	6665	99	226643	0.339772	0.63125
CDK19	5	6665	130	226643	0.34287	0.633129
ABR	4	6665	100	226643	0.346264	0.633129
DIP2C	3	6665	70	226643	0.34683	0.633129
MSH5	3	6665	70	226643	0.34683	0.633129
RFX3	3	6665	70	226643	0.34683	0.633129
FOXO3	6	6665	162	226643	0.348489	0.633129
PLXDC2	6	6665	162	226643	0.348489	0.633129
SEC1	2	6665	41	226643	0.348848	0.633129
SKAP1	2	6665	41	226643	0.348848	0.633129
SLTM	2	6665	41	226643	0.348848	0.633129
SMAD6	2	6665	41	226643	0.348848	0.633129
THRB	2	6665	41	226643	0.348848	0.633129
ADRA1A	1	6665	14	226643	0.352607	0.633129
AFMID	1	6665	14	226643	0.352607	0.633129
ANKLE1	1	6665	14	226643	0.352607	0.633129
ARMC6	1	6665	14	226643	0.352607	0.633129
ATG4A	1	6665	14	226643	0.352607	0.633129
CCDC106	1	6665	14	226643	0.352607	0.633129
CDK5RAP3	1	6665	14	226643	0.352607	0.633129
CIC	1	6665	14	226643	0.352607	0.633129
CLEC6A	1	6665	14	226643	0.352607	0.633129
CORO2B	1	6665	14	226643	0.352607	0.633129
CTCFL	1	6665	14	226643	0.352607	0.633129
DNAJB12	1	6665	14	226643	0.352607	0.633129
DPP7	1	6665	14	226643	0.352607	0.633129
ERP29	1	6665	14	226643	0.352607	0.633129
FAM102B	1	6665	14	226643	0.352607	0.633129
FKBP11	1	6665	14	226643	0.352607	0.633129
GNA13	1	6665	14	226643	0.352607	0.633129
GPATCH3	1	6665	14	226643	0.352607	0.633129
HBP1	1	6665	14	226643	0.352607	0.633129
HSPB1	1	6665	14	226643	0.352607	0.633129
IKZF3	1	6665	14	226643	0.352607	0.633129
IL16	1	6665	14	226643	0.352607	0.633129
IL17RE	1	6665	14	226643	0.352607	0.633129
KILLIN	1	6665	14	226643	0.352607	0.633129
LIMK2	1	6665	14	226643	0.352607	0.633129
LMBRD2	1	6665	14	226643	0.352607	0.633129
MTMR2	1	6665	14	226643	0.352607	0.633129
NAA16	1	6665	14	226643	0.352607	0.633129
NOTCH4	1	6665	14	226643	0.352607	0.633129
PGAP3	1	6665	14	226643	0.352607	0.633129
PLSCR4	1	6665	14	226643	0.352607	0.633129
PPP4R1L	1	6665	14	226643	0.352607	0.633129
PRKAB2	1	6665	14	226643	0.352607	0.633129
RAB3A	1	6665	14	226643	0.352607	0.633129
RAD54L2	1	6665	14	226643	0.352607	0.633129
RNF4	1	6665	14	226643	0.352607	0.633129
SALL2	1	6665	14	226643	0.352607	0.633129
SENP1	1	6665	14	226643	0.352607	0.633129
SERTAD2	1	6665	14	226643	0.352607	0.633129
SPPL2B	1	6665	14	226643	0.352607	0.633129
STK19	1	6665	14	226643	0.352607	0.633129
SYNGR4	1	6665	14	226643	0.352607	0.633129
TACR1	1	6665	14	226643	0.352607	0.633129
TRPC4AP	1	6665	14	226643	0.352607	0.633129
TXNDC12	1	6665	14	226643	0.352607	0.633129
UBE2W	1	6665	14	226643	0.352607	0.633129
USP46	1	6665	14	226643	0.352607	0.633129
YTHDF3	1	6665	14	226643	0.352607	0.633129
ZDHHC21	1	6665	14	226643	0.352607	0.633129
ZNF566	1	6665	14	226643	0.352607	0.633129
KLF7	3	6665	71	226643	0.354656	0.636463
AHRR	2	6665	42	226643	0.359236	0.641587
AMMECR1	2	6665	42	226643	0.359236	0.641587
ASAP2	2	6665	42	226643	0.359236	0.641587
GPC4	2	6665	42	226643	0.359236	0.641587
MAT2B	2	6665	42	226643	0.359236	0.641587
OPHN1	2	6665	42	226643	0.359236	0.641587
VPS13C	2	6665	42	226643	0.359236	0.641587
VPS52	2	6665	42	226643	0.359236	0.641587
ST7L	4	6665	102	226643	0.35925	0.641587
LYPLAL1	3	6665	72	226643	0.362469	0.642368
ATP8A1	6	6665	165	226643	0.363703	0.642368
DCAKD	4	6665	103	226643	0.365741	0.642368
ERBB4	4	6665	103	226643	0.365741	0.642368
ABCA1	2	6665	43	226643	0.369562	0.642368
ATP9B	2	6665	43	226643	0.369562	0.642368
GGNBP2	2	6665	43	226643	0.369562	0.642368
MYO18A	2	6665	43	226643	0.369562	0.642368
PER3	2	6665	43	226643	0.369562	0.642368
STK4	2	6665	43	226643	0.369562	0.642368
ZBTB4	2	6665	43	226643	0.369562	0.642368
PARD3	3	6665	73	226643	0.370267	0.642368
ACSS3	1	6665	15	226643	0.371103	0.642368
AHSA2	1	6665	15	226643	0.371103	0.642368
ANK1	1	6665	15	226643	0.371103	0.642368
ASXL1	1	6665	15	226643	0.371103	0.642368
BRAF	1	6665	15	226643	0.371103	0.642368
C6orf182	1	6665	15	226643	0.371103	0.642368
C6orf70	1	6665	15	226643	0.371103	0.642368
DCAF5	1	6665	15	226643	0.371103	0.642368
DEDD	1	6665	15	226643	0.371103	0.642368
DIS3L2	1	6665	15	226643	0.371103	0.642368
DNAH3	1	6665	15	226643	0.371103	0.642368
ETV1	1	6665	15	226643	0.371103	0.642368
FAM20B	1	6665	15	226643	0.371103	0.642368
FAM57A	1	6665	15	226643	0.371103	0.642368
FASTKD1	1	6665	15	226643	0.371103	0.642368
FRAT2	1	6665	15	226643	0.371103	0.642368
FURIN	1	6665	15	226643	0.371103	0.642368
FUZ	1	6665	15	226643	0.371103	0.642368
GBF1	1	6665	15	226643	0.371103	0.642368
GJC1	1	6665	15	226643	0.371103	0.642368
GOPC	1	6665	15	226643	0.371103	0.642368
HARBI1	1	6665	15	226643	0.371103	0.642368
HERPUD1	1	6665	15	226643	0.371103	0.642368
HOXA7	1	6665	15	226643	0.371103	0.642368
HSBP1L1	1	6665	15	226643	0.371103	0.642368
HTRA1	1	6665	15	226643	0.371103	0.642368
IQCH	1	6665	15	226643	0.371103	0.642368
KIAA0528	1	6665	15	226643	0.371103	0.642368
KLRB1	1	6665	15	226643	0.371103	0.642368
LHX1	1	6665	15	226643	0.371103	0.642368
LOC285375	1	6665	15	226643	0.371103	0.642368
LRRIQ3	1	6665	15	226643	0.371103	0.642368
LYSMD2	1	6665	15	226643	0.371103	0.642368
MKS1	1	6665	15	226643	0.371103	0.642368
MMAA	1	6665	15	226643	0.371103	0.642368
NCRNA00183	1	6665	15	226643	0.371103	0.642368
NEAT1	1	6665	15	226643	0.371103	0.642368
NEBL	1	6665	15	226643	0.371103	0.642368
PAAF1	1	6665	15	226643	0.371103	0.642368
POFUT1	1	6665	15	226643	0.371103	0.642368
SEC14L1	1	6665	15	226643	0.371103	0.642368
SEH1L	1	6665	15	226643	0.371103	0.642368
TIMP2	1	6665	15	226643	0.371103	0.642368
UBA5	1	6665	15	226643	0.371103	0.642368
ZC3H7A	1	6665	15	226643	0.371103	0.642368
ZMYM6	1	6665	15	226643	0.371103	0.642368
ZNF592	1	6665	15	226643	0.371103	0.642368
CDKAL1	15	6665	456	226643	0.37146	0.642651
MSRA	4	6665	104	226643	0.372229	0.643646
PRMT3	3	6665	74	226643	0.378047	0.648712
NAALADL2	4	6665	105	226643	0.378711	0.648712
ACACA	7	6665	200	226643	0.379732	0.648712
C5orf13	2	6665	44	226643	0.379821	0.648712
C7orf50	2	6665	44	226643	0.379821	0.648712
DOT1L	2	6665	44	226643	0.379821	0.648712
FER	2	6665	44	226643	0.379821	0.648712
HDAC4	2	6665	44	226643	0.379821	0.648712
LGSN	2	6665	44	226643	0.379821	0.648712
PHF7	2	6665	44	226643	0.379821	0.648712
AIMP1	1	6665	16	226643	0.38907	0.648712
ALKBH5	1	6665	16	226643	0.38907	0.648712
AP2A2	1	6665	16	226643	0.38907	0.648712
ARFGAP2	1	6665	16	226643	0.38907	0.648712
BCL2	1	6665	16	226643	0.38907	0.648712
BCYRN1	1	6665	16	226643	0.38907	0.648712
BTF3L4	1	6665	16	226643	0.38907	0.648712
BZW2	1	6665	16	226643	0.38907	0.648712
C17orf44	1	6665	16	226643	0.38907	0.648712
C17orf75	1	6665	16	226643	0.38907	0.648712
C19orf23	1	6665	16	226643	0.38907	0.648712
C20orf29	1	6665	16	226643	0.38907	0.648712
C21orf29	1	6665	16	226643	0.38907	0.648712
C6orf129	1	6665	16	226643	0.38907	0.648712
CCDC138	1	6665	16	226643	0.38907	0.648712
CDK10	1	6665	16	226643	0.38907	0.648712
CFLP1	1	6665	16	226643	0.38907	0.648712
CYTSA	1	6665	16	226643	0.38907	0.648712
DCLRE1A	1	6665	16	226643	0.38907	0.648712
DHX34	1	6665	16	226643	0.38907	0.648712
EIF2B5	1	6665	16	226643	0.38907	0.648712
EPS15L1	1	6665	16	226643	0.38907	0.648712
EPT1	1	6665	16	226643	0.38907	0.648712
FAM129B	1	6665	16	226643	0.38907	0.648712
FAM53C	1	6665	16	226643	0.38907	0.648712
FLJ10038	1	6665	16	226643	0.38907	0.648712
GOLGA4	1	6665	16	226643	0.38907	0.648712
KCNN1	1	6665	16	226643	0.38907	0.648712
KCTD15	1	6665	16	226643	0.38907	0.648712
LASP1	1	6665	16	226643	0.38907	0.648712
LRRK1	1	6665	16	226643	0.38907	0.648712
MAPK10	1	6665	16	226643	0.38907	0.648712
MAPKAPK5	1	6665	16	226643	0.38907	0.648712
MBIP	1	6665	16	226643	0.38907	0.648712
MCOLN3	1	6665	16	226643	0.38907	0.648712
MDM2	1	6665	16	226643	0.38907	0.648712
NAT9	1	6665	16	226643	0.38907	0.648712
NFX1	1	6665	16	226643	0.38907	0.648712
NUMB	1	6665	16	226643	0.38907	0.648712
OPRL1	1	6665	16	226643	0.38907	0.648712
PRDXDD1P	1	6665	16	226643	0.38907	0.648712
PRR3	1	6665	16	226643	0.38907	0.648712
PTMS	1	6665	16	226643	0.38907	0.648712
RAB6A	1	6665	16	226643	0.38907	0.648712
RBM26	1	6665	16	226643	0.38907	0.648712
SCMH1	1	6665	16	226643	0.38907	0.648712
SETD8	1	6665	16	226643	0.38907	0.648712
SLC22A20	1	6665	16	226643	0.38907	0.648712
SLCO5A1	1	6665	16	226643	0.38907	0.648712
TBC1D2B	1	6665	16	226643	0.38907	0.648712
TMEM17	1	6665	16	226643	0.38907	0.648712
TNFRSF10A	1	6665	16	226643	0.38907	0.648712
TSC22D3	1	6665	16	226643	0.38907	0.648712
TTC39C	1	6665	16	226643	0.38907	0.648712
UBE3C	1	6665	16	226643	0.38907	0.648712
USP40	1	6665	16	226643	0.38907	0.648712
ZEB1	1	6665	16	226643	0.38907	0.648712
ZNF384	1	6665	16	226643	0.38907	0.648712
ZNFX1	1	6665	16	226643	0.38907	0.648712
ALDOA	2	6665	45	226643	0.390009	0.648712
LIN28B	2	6665	45	226643	0.390009	0.648712
LOC100133985	2	6665	45	226643	0.390009	0.648712
NINJ2	2	6665	45	226643	0.390009	0.648712
PRKACB	2	6665	45	226643	0.390009	0.648712
RNF111	2	6665	45	226643	0.390009	0.648712
ST8SIA4	2	6665	45	226643	0.390009	0.648712
FBXO46	3	6665	76	226643	0.393542	0.653933
GANC	3	6665	76	226643	0.393542	0.653933
FOXN3	6	6665	171	226643	0.394201	0.654701
[truncated: 1,321 more rows]
